# Supplementary material for: Liver microRNA transcriptome reveals miR-182 as link between type 2 diabetes and fatty liver disease in obesity
Source: eLife journal article supplement (doi:10.7554/elife.92075), 2023-12-01
Supplement: fig2-data2 [file elife-92075-fig2-data2-v1.pdf]

Figure 2 E (1/4): Chemiluminescence image of biological replicate 1 and 2

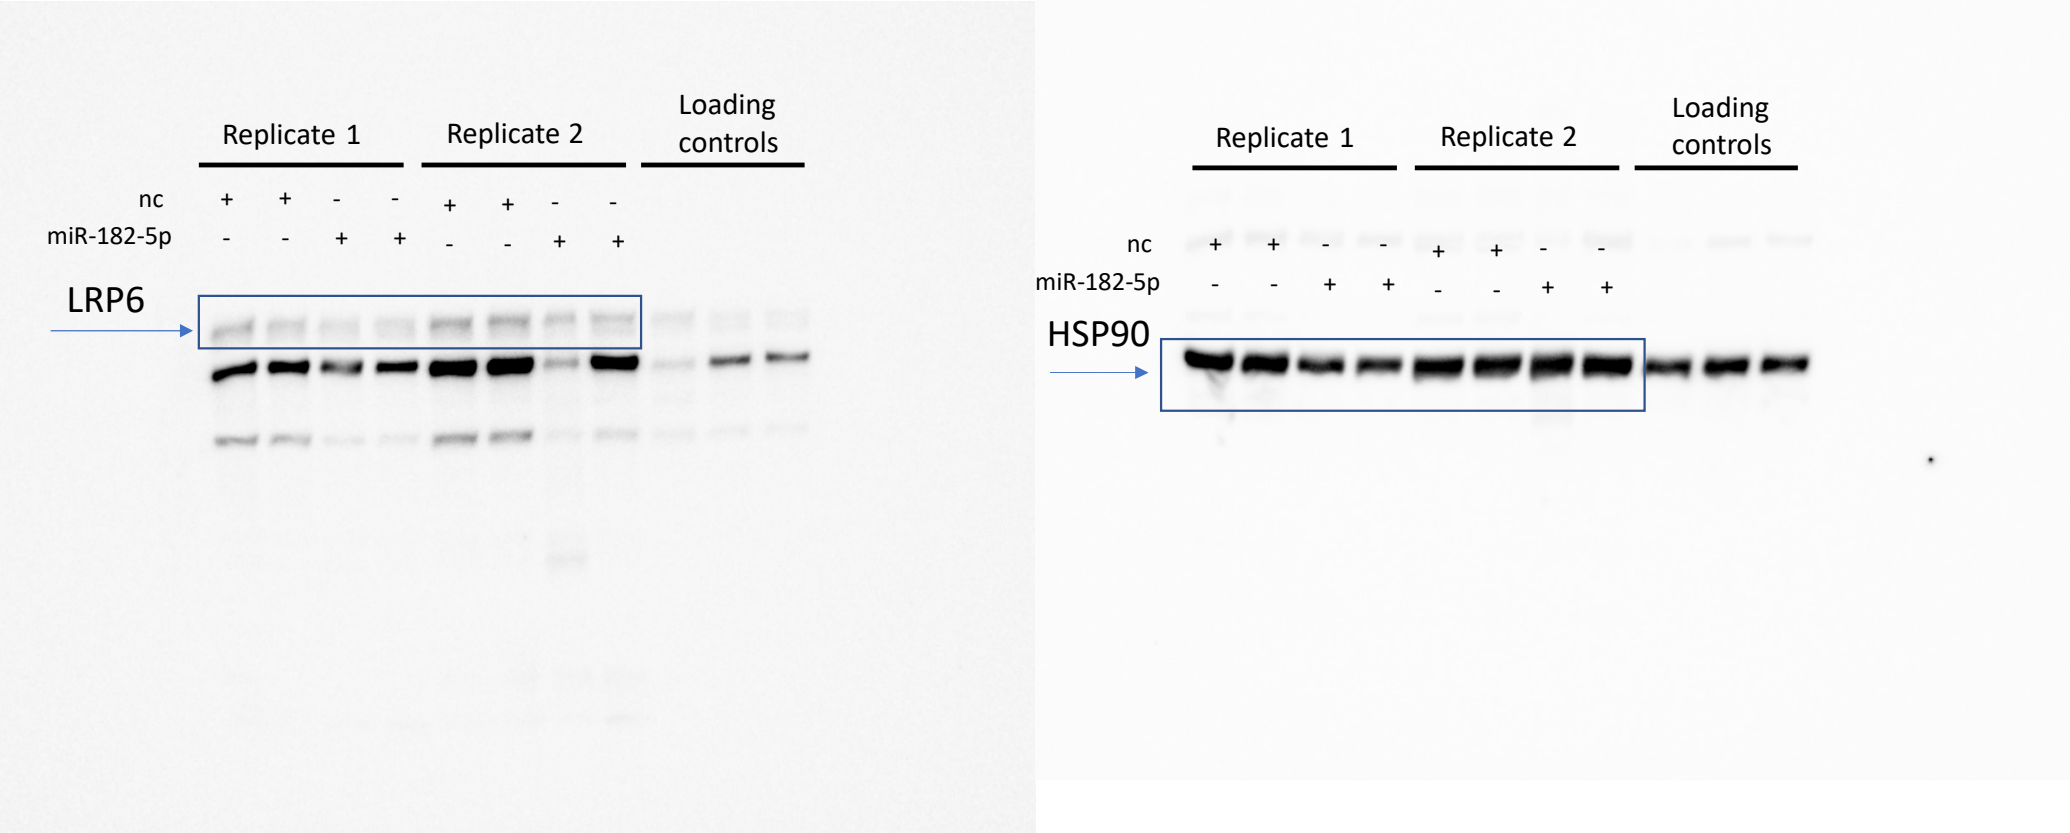

Parts of the blot used for quantification are indicated by a blue box

Figure 2 E (2/4): Multichannel image of replicate 1 and 2 with marker

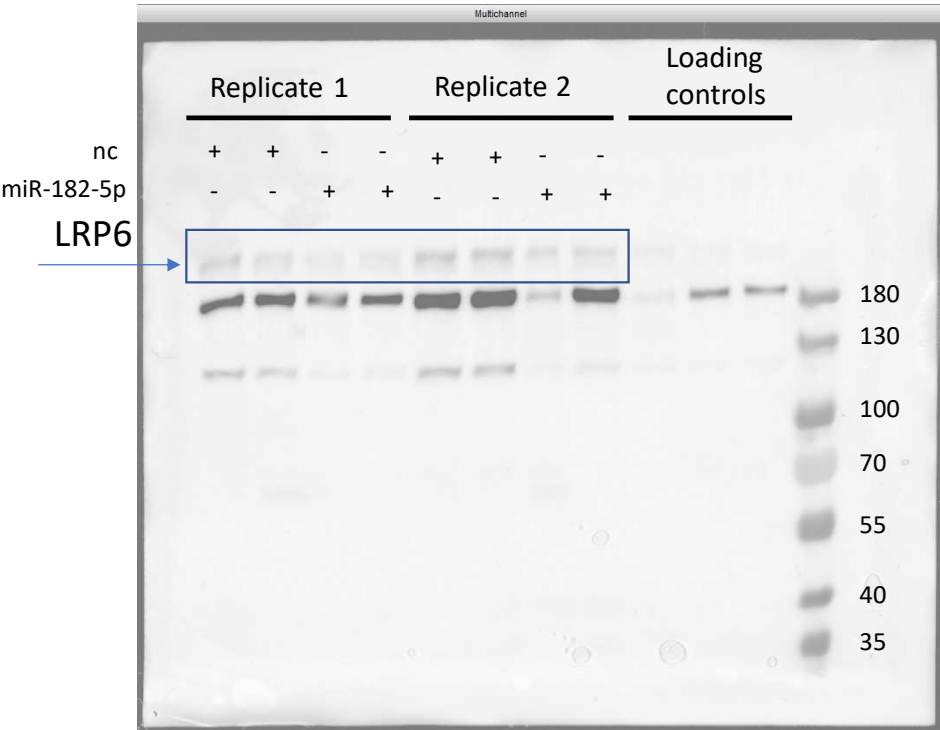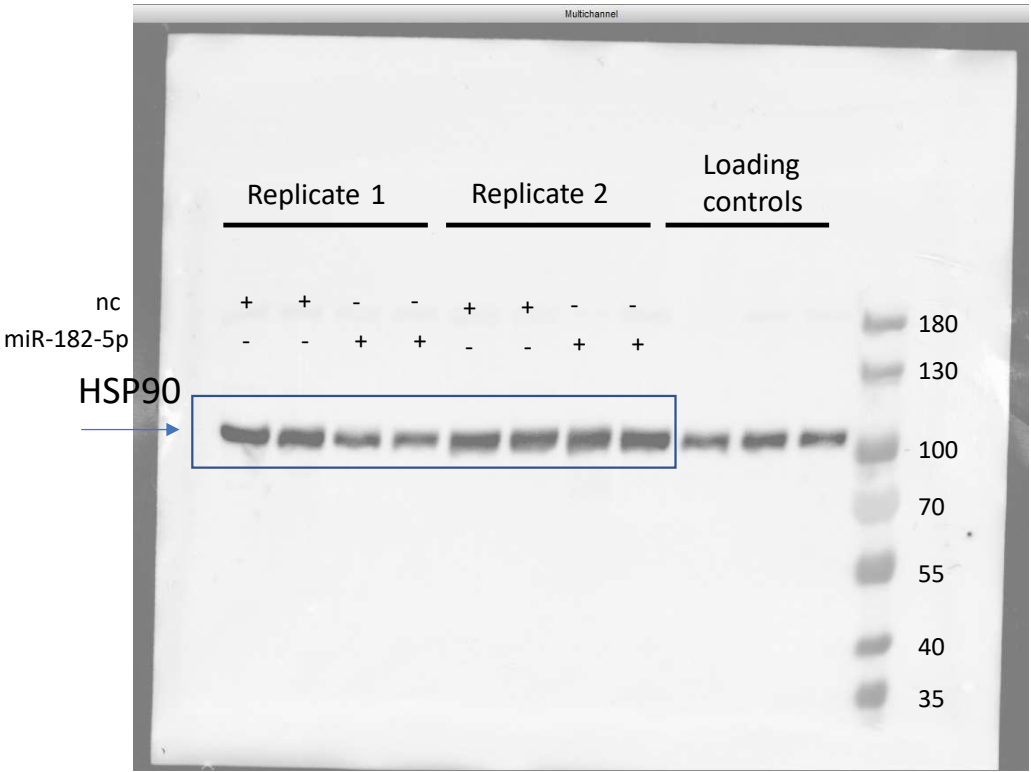

Parts of the blot used for quantification are indicated by a blue box

Figure 2 E (3/4): Chemiluminescence image of biological replicate 3

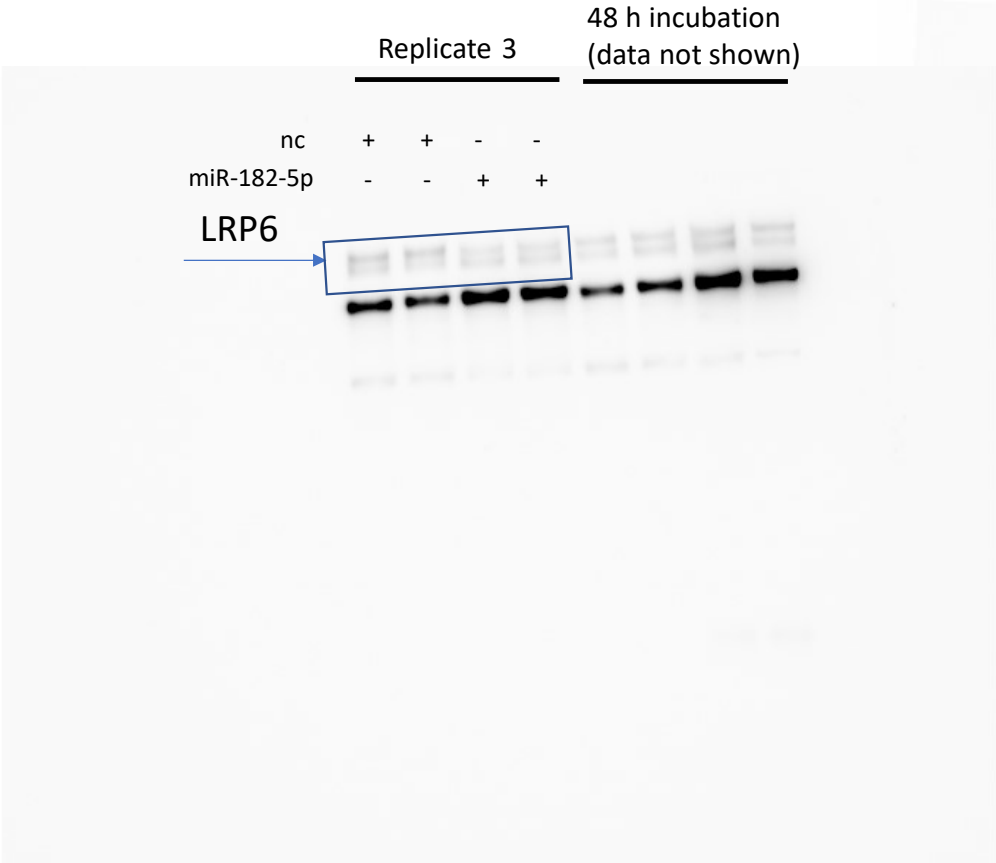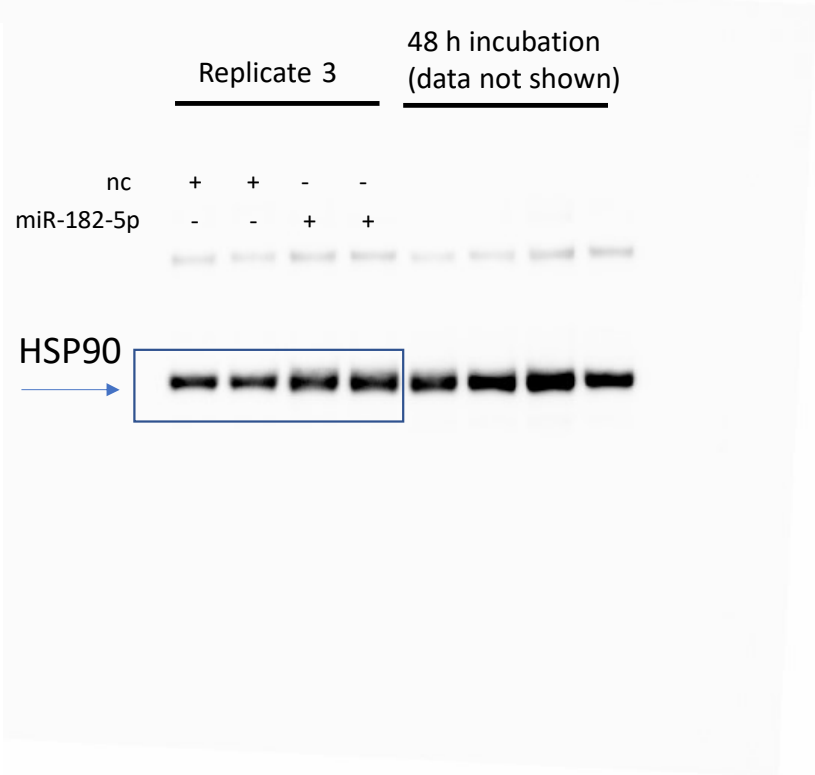

Parts of the blot used for quantification are indicated by a blue box

Figure 2 E (4/4): Multichannel image of replicate 3 with marker

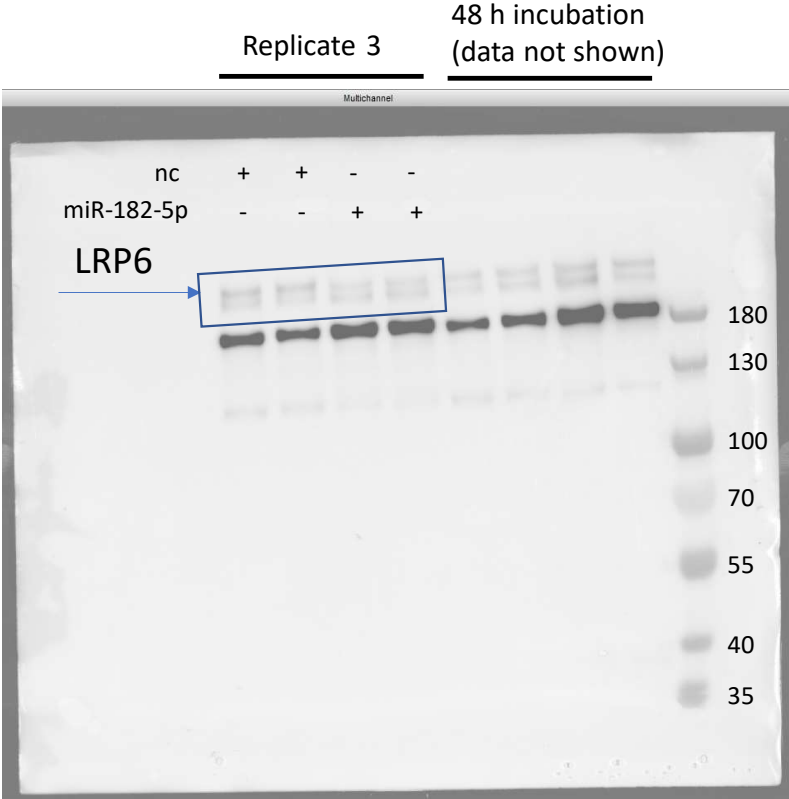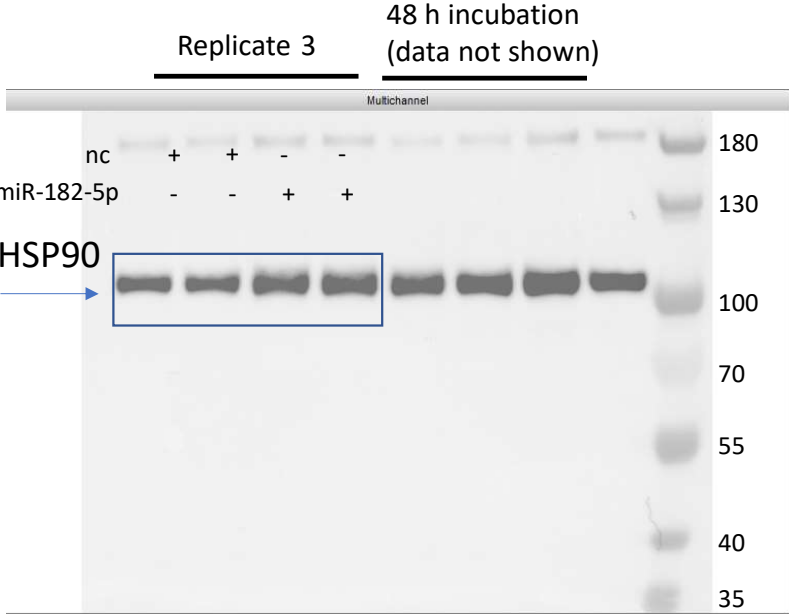

Parts of the blot used for quantification are indicated by a blue box
