# Supplementary material for: Liver microRNA transcriptome reveals miR-182 as link between type 2 diabetes and fatty liver disease in obesity
Source: eLife journal article supplement (doi:10.7554/elife.92075), 2023-12-01
Supplement: fig2-data4 [file elife-92075-fig2-data4-v1.pdf]

Figure 2 H (1/2):

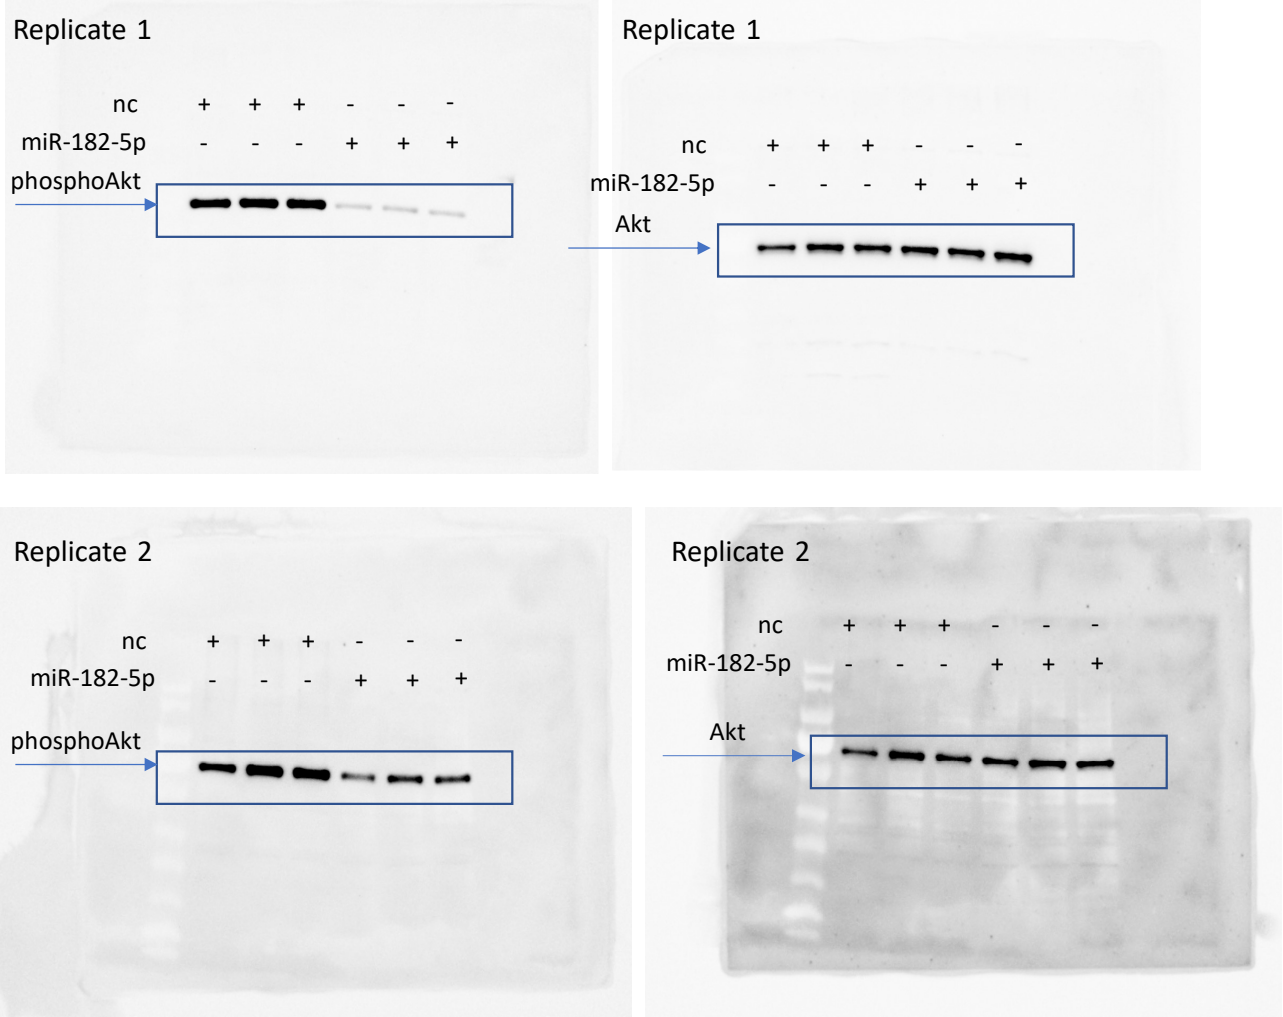

Parts of the blot used for quantification are indicated by a blue box

Figure 2 H (2/2):

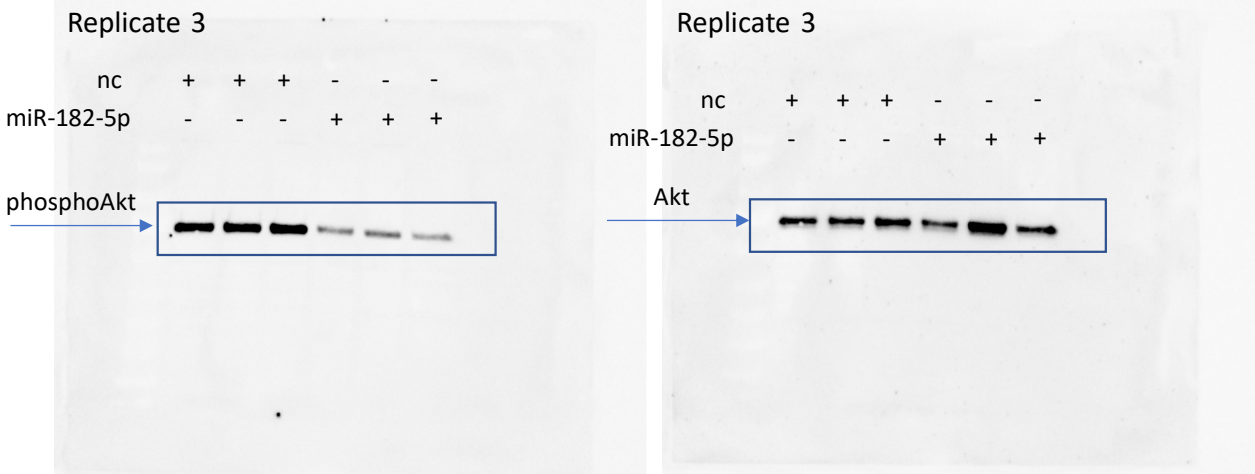

Parts of the blot used for quantification are indicated by a blue box
