# Supplementary material for: Liver microRNA transcriptome reveals miR-182 as link between type 2 diabetes and fatty liver disease in obesity
Source: eLife. 2024 Jul 22;12:RP92075. doi: 10.7554/eLife.92075 (PMC11262792; doi:10.7554/eLife.92075)
Supplement: Figure 2—source data 5. [file elife-92075-fig2-data5.xlsx]

## Sheet: Sheet1
ID	HbA1c	T2D	NAS	sex	BMI	age	glucose	insulin	triglycerides	lipid	Cholesteringesamt	HDL	LDL	AST	ALT	miR_182_5p_dCT	SCD_dCT	FASN_dCT	ELOVL6_dCT	ACACA_dCT	PNPLA2_dCT	PPARA_dCT	LRP6_dCT	PDK1_dCT	INSR_dCT	IRS1_dCT	FOXO1_dCT	PCK1_dCT	G6PC_dCT	DHCR7_dCT	HMGCS1_dCT	INISG1_dCT	Serum_miR_182_5p_dCT
1001	3.9	0	0	2	46.61	31	97	68.329	NaN	5	NaN	NaN	NaN	21	60	10.791	-0.685	-0.789	2.518	1.079	2.027	-2.809	-1.425	2.577	-1.615	1.65	0.671	-7.024	-2.822	1.299	5.879	1.282	11.219
1007	5.3	0	0	2	56.93	33	90	49.986	247	1	202	33	120	15	17	12.158	-3.661	-2.849	0.213	0.753	1.601	-3.348	-0.704	2.567	-1.653	1.055	1.493	-5.833	-2.051	-0.186	6.171	1.529	5.38
1009	4.6	0	0	2	71.76	36	93	42.602	109	NaN	171	54	95	16	17	12.131	-3.043	-2.144	-0.034	1.049	1.131	-2.43	-0.315	2.672	-1.604	1.509	1.589	-6.153	-2.909	-0.86	3.278	1.434	4.938
1010	4.8	0	3	2	55.77	35	85	46.611	62	1	169	33	124	12	15	11.858	-2.573	0.311	1.95	1.88	0.845	-2.139	-0.287	2.67	-1.794	1.411	0.272	-5.802	-3.342	0.216	4.501	0.838	NaN
1013	5.3	0	4	2	64	49	106	47.189	81	15	254	66	172	27	18	10.287	-2.948	-0.192	1.156	2.052	0.912	-2.18	-0.188	2.628	-2.047	1.604	1.278	-6.748	-3.385	-0.268	3.159	0.503	8.224
1014	5.6	0	3	2	41.43	49	75	39.299	104	5	190	59	110	10	16	10.707	-2.211	-1.22	0.598	0.154	2.467	-2.879	-0.575	3.071	-1.707	0.915	1.713	-6.232	-2.428	0.772	5.123	0.71	10.814
1018	5.6	0	2	1	71.73	54	93	NaN	143	NaN	219	42	148	15	13	12.005	-4.141	0.079	-0.295	2.218	1.456	-1.819	0.01	1.807	-2.402	1.951	1.548	-6.191	-3.762	-0.787	3.618	-0.242	NaN
1019	5.5	0	4	2	47.32	32	107	65.903	168	30	190	76	81	15	18	10.436	-2.749	-0.551	0.747	1.428	0.931	-2.169	-0.658	2.149	-1.881	0.8	1.448	-7.037	-4.317	-0.479	2.133	0.541	7.749
1021	5.6	0	0	2	60.14	49	96	54	139	0	175	56	91	22	17	11.696	-1.337	-0.13	0.23	1.67	0.929	-2.381	-0.37	2.828	-1.529	1.315	1.616	-7.05	-3.498	0.521	3.722	0.708	NaN
1022	5.4	0	0	2	48.48	28	88	49.33	100	10	192	42	130	14	16	11.337	-3.022	-2.894	0.394	-0.309	NaN	-3.398	-0.873	3.165	-0.877	1.853	2.212	-6.041	-0.681	0.855	NaN	2.07	NaN
1024	4.9	0	0	2	46.17	34	99	47.986	57	20	149	56	82	14	15	11.202	-3.979	-1.691	0.202	0.958	1.223	-2.472	-0.601	3.261	-1.808	1.005	0.829	-6.822	-3.415	-1.052	2.141	-0.103	7.255
1029	5	0	0	2	65.64	22	97	36.856	139	NaN	183	43	112	13	10	12.432	-2.463	-0.813	1.694	1.446	2.101	-2.537	-0.185	2.538	-1.891	2.18	NaN	-5.723	-2.466	-0.131	3.854	1.484	NaN
1030	4.8	0	0	2	47.06	23	82	27.251	119	NaN	187	53	110	14	21	12.334	-3.904	-2.079	0.387	0.776	1.325	-2.583	-0.567	2.769	-1.772	1.658	1.379	-6.55	-3.716	-0.678	2.276	0.909	NaN
1031	5	0	0	2	62.28	47	100	22.682	178	NaN	173	58	79	58	85	12.459	-3.243	-0.779	0.803	1.29	0.615	-2.785	-0.129	2.967	-1.55	1.288	1.791	-6.204	-3.121	-0.645	5.531	0.895	3.267
1033	5.3	0	4	2	57.16	41	103	160.289	159	30	154	40	82	15	22	12.21	-2.22	-1.715	0.995	0.889	NaN	-2.978	-0.302	3.484	-1.283	1.804	0.774	-5.713	-0.4	0.874	NaN	2.011	3.863
1034	5.1	0	3	2	42.47	53	105	45.807	245	NaN	235	46	140	16	27	11.527	-2.808	-2.035	0.547	1.252	0.791	-2.368	-0.477	2.59	-1.749	0.943	1.823	-6.57	-3.181	-0.952	2.466	0.485	5.945
1036	5.2	0	0	1	35	49	97	90.164	164	25	154	55	66	16	25	10.356	-2.654	-1.513	0.977	1.103	2.902	-2.876	-0.814	2.835	-1.775	0.85	1.677	-6.411	-2.834	0.704	6.021	1.195	8.529
1037	5.2	0	6	1	45.92	48	94	101.911	192	40	190	35	117	42	65	10.448	-2.579	-1.982	1.158	0.84	2.636	-3.122	-0.578	3.535	-1.191	0.922	1.193	-6.196	-0.309	0.407	6.192	1.96	7.376
1038	5.6	0	0	1	52.01	34	81	221.518	185	25	151	34	80	31	71	10.122	-2.024	-1.493	0.645	0.718	1.941	-2.805	-0.446	2.452	-1.636	2.044	0.844	-5.76	-1.705	0.82	5.475	1.783	8.151
1040	5.4	0	5	2	60.45	61	112	178.741	364	70	173	29	71	32	34	9.395	-1.354	-2.96	NaN	-0.643	NaN	-2.429	NaN	3.612	NaN	3.256	2.741	-4.441	-0.449	2.01	NaN	3.415	9.197
1045	5.4	0	0	2	45.94	40	91	35.882	208	7.5	159	50	67	13	11	12.163	-3.233	-2.307	0.009	1.296	1.682	-2.417	-0.193	3.412	-1.862	1.397	1.412	-5.69	-2.53	0.506	4.648	-0.246	4.491
1048	5.6	0	NaN	1	50.64	30	79	220.282	238	60	185	35	102	25	42	11.469	-4.767	-1.978	0.336	1.11	1.406	-2.585	-0.547	2.788	-1.505	1.672	1.47	-5.819	-1.533	-0.032	3.066	0.529	NaN
1049	5.1	0	0	2	32.19	23	87	28.954	101	0	183	56	107	16	26	12.525	-1.915	0.132	1.423	1.993	1.214	-2.983	0.054	3.688	-1.706	0.511	1.091	-6.661	-2.81	0.199	5.564	1.207	NaN
1050	5.1	0	2	2	48.27	27	90	20.855	140	1	151	62	61	17	16	9.571	-4.749	-1.621	0.556	1.754	1.852	-2.078	0.075	2.372	-1.935	1.931	1.598	-5.423	-2.308	-1.103	3.097	-0.453	NaN
1055	5.1	0	5	2	59.02	28	102	95.289	160	70	150	41	77	21	36	10.465	-4.534	-0.774	1.061	1.286	1.278	-2.296	-0.352	3.414	-1.916	0.969	1.344	-5.861	-2.937	NaN	3.253	0.583	9.685
1057	5.4	0	5	2	62.08	37	110	183.414	458	40	220	24	NaN	33	31	10.242	-4.559	-1.824	1.293	1.704	1.855	-2.104	0.394	2.867	-1.827	1.137	1.326	-5.621	-1.516	-0.243	4.778	1.002	8.513
1058	5.6	0	2	2	52.8	26	79	36.744	173	1	184	41	108	10	10	12.39	-2.618	-1.028	0.743	0.884	1.337	-3.042	-0.555	2.688	-1.67	0.678	1.489	-6.544	-3.43	-0.649	3.758	0.754	NaN
1059	5.1	0	2	2	53.24	34	109	47.542	177	5	199	50	114	12	18	11.03	-3.549	-0.473	0.652	1.682	1.164	-1.829	-0.123	3.011	-2.054	0.604	0.802	-6.586	-3.102	-1.637	1.765	0.17	3.634
1064	5.2	0	2	2	50.78	27	94	NaN	150	5	159	39	90	12	15	11.108	-2.165	-1.064	1.054	1.231	2.385	-3.038	-0.808	3.198	-1.691	0.605	1.335	-6.41	-2.57	0.163	4.749	0.49	NaN
1067	4.9	0	3	2	42	33	94	73.75	147	15	224	49	146	26	28	11.743	-3.863	-0.999	0.501	1.553	1.222	-2.194	0.09	2.8	-2.402	1.08	0.527	-5.904	-1.769	-2.097	0.997	0.244	8.358
1071	5.1	0	0	2	53.01	37	91	40.161	129	0	160	50	84	25	26	11.915	-3.175	-0.028	1.466	2.129	1.283	-2.18	-0.225	2.66	-1.982	0.852	1.335	-6.166	-3.11	-0.852	4.647	0.363	7.864
1075	5.4	0	0	2	84.77	52	86	66.32	253	0	198	31	116	17	12	8.61	-1.864	-1.091	1.726	1.42	2.205	-2.275	0.027	2.866	-1.424	2.114	0.678	-5.368	-1.815	1.266	4.905	1.021	12.469
1076	5.1	0	NaN	2	42.87	44	82	24.409	118	NaN	230	64	142	21	23	11.855	-4.606	-1.779	0.335	1.36	1.098	-2.735	-0.706	2.515	-1.754	NaN	1.425	-6.243	-3.072	-0.574	5.252	-0.162	NaN
1086	5.6	0	1	2	68.96	32	111	137.941	109	10	169	70	77	13	17	11.975	NaN	-2.544	2.317	-0.558	NaN	-3.809	-0.117	NaN	NaN	1.695	NaN	-5.11	0.532	4.019	NaN	5.567	NaN
1088	5.1	0	3	2	66.1	37	101	115.422	214	40	230	42	145	23	27	10.672	-3.127	-1.113	0.786	1.654	1.66	-1.471	-0.391	2.987	-2.285	2.466	0.994	-5.826	-2.914	-1.243	1.926	0.323	6.29
1090	4.9	0	1	2	40.53	24	87	64.194	108	10	211	47	142	16	25	12.898	-4.335	-2.256	1.591	0.977	1.918	-2.493	0.321	3.719	-2.078	1.736	NaN	-4.882	-0.623	-1.752	2.318	0.342	9.678
1093	5	0	1	2	51.17	30	76	100.836	173	10	125	26	64	25	48	10.916	-4.449	0.279	1.035	2.519	0.436	-1.754	0.302	3.73	-2.148	0.677	1.7	-6.33	-3.042	-0.986	2.076	0.604	NaN
1094	4.3	0	2	2	42.56	58	182	40.386	278	20	209	37	116	31	29	9.997	-1.201	-1.529	1.101	1.517	NaN	-2.329	1.019	3.45	-1.553	2.247	1.291	-3.706	-0.852	0.949	NaN	1.832	7.321
1095	4.5	0	NaN	2	84.87	40	79	51.65	132	80	166	39	101	23	31	11.36	-3.028	-0.704	1.057	1.621	1.522	-1.466	0.617	3.314	-1.542	1.55	1.651	-5.551	-2.163	-1.092	1.997	1.175	8.988
1096	4.9	0	1	2	52.58	46	78	83.262	72	NaN	170	47	109	11	9	11.635	-2.812	-0.636	1.808	1.51	0.697	-3.023	-0.585	2.889	-1.761	0.918	1.019	-6.244	-2.419	0.29	4.198	2.131	10.478
1100	5.5	0	4	2	59.92	28	90	50.714	152	60	253	49	174	19	26	11.687	-4.571	-0.957	1.014	2.14	1.994	-1.954	0.359	3.23	-2.101	1.002	1.59	-5.156	-2.125	-0.551	4.343	0.742	8.549
1102	5.3	0	4	1	62.09	60	100	76.612	207	35	254	48	165	24	30	10.776	-1.903	-2.4	0.945	0.302	2.386	-3.274	-0.801	3.828	-1.481	NaN	1.451	-6.028	-1.179	-0.096	5.278	2.291	8.709
1104	4.9	0	0	2	53.07	25	106	64.711	193	0	128	39	50	19	16	10.962	NaN	-2.985	0.754	0.819	NaN	NaN	NaN	3.61	NaN	NaN	1.409	-5.238	-1.241	0.57	4.677	1.288	6.503
1106	5.2	0	6	1	45	34	85	64.287	128	80	160	59	75	65	87	9.182	NaN	-1.602	1.48	1.183	2.965	NaN	NaN	2.653	-1.776	NaN	NaN	-5.201	-1.647	NaN	2.493	1.177	6.418
1004	8.4	1	4	1	40.35	65	274	395.641	367	45	152	25	54	46	62	10.681	-2.205	-1.903	1.58	0.409	2.588	-2.862	-0.614	3.258	-1.41	2.493	1.807	-6.221	-2.223	1.215	4.279	2.271	8.2
1008	5.2	1	NaN	2	48.27	23	123	156.645	191	20	197	62	97	20	25	10.651	NaN	NaN	NaN	3.628	1.157	NaN	2.191	3.844	-0.746	4.046	1.581	NaN	NaN	2.638	6.199	1.999	NaN
1011	9.2	1	5	1	57.01	57	156	NaN	175	70	201	55	111	40	42	8.686	-3.205	-0.509	1.465	2.225	1.619	-1.236	0.798	2.574	-1.199	2.733	1.845	-4.114	-0.962	-0.22	2.61	0.747	8.571
1012	8.5	1	0	2	56.69	38	160	NaN	220	1	193	58	91	37	27	10.045	-4.939	-0.401	-0.219	1.655	0.633	-2.013	0.322	2.074	-1.963	2.019	1.465	-5.827	-3.014	-2.3	-1.309	0.194	NaN
1015	9	1	5	2	58.11	62	178	110.481	498	30	367	25	NaN	75	43	9.095	-4.366	-1.698	0.214	1.351	1.769	-1.954	0.515	2.155	-2.203	2.223	0.122	-6.912	-3.681	-2.347	0.428	NE	8.538
1016	7.1	1	5	1	52.01	51	190	127.578	403	40	161	17	NaN	35	31	8.347	-3.562	-1.957	2.348	0.994	2.19	-2.145	0.252	3.044	-1.598	2.664	0.41	-4.889	-1.332	0.378	6.919	2.353	8.817
1017	6.9	1	NaN	2	46.68	34	119	53.675	201	30	221	37	144	21	27	10.986	-4.021	-1.968	0.863	1.526	2.122	-1.613	0.634	2.411	-1.503	1.993	1.678	-4.788	-3.089	-0.45	3.675	0.821	4.818
1020	7.5	1	5	1	50.2	42	125	192.266	256	60	216	30	135	17	29	10.048	-4.617	-1.456	0.456	1.492	1.378	-1.548	0.059	2.423	-1.942	1.953	1.529	-6.335	-2.093	0.254	4.835	0.368	9.321
1027	5.5	1	0	2	41	51	100	25.841	243	NaN	266	51	166	25	28	11.462	-2.837	-0.988	0.855	1.923	1.456	-2.262	0.09	2.978	-1.829	1.602	0.718	-5.733	-2.54	0.23	4.54	0.604	NaN
1028	7	1	5	2	52.44	54	119	211.226	183	NaN	214	65	112	13	19	11.576	-4.312	-1.038	0.914	1.838	1.179	-1.532	0.159	2.06	-1.609	2.419	1.417	-5.649	-3.457	-1.77	0.547	0.604	8.519
1035	9.5	1	3	2	50.78	65	287	40.767	188	20	148	50	60	16	18	11.287	-3.596	-2.061	0.866	0.107	2.383	-3.326	-0.513	3.339	-1.414	1.151	1.954	-6.551	-2.239	-0.384	4.596	0.9	7.591
1039	11.8	1	6	1	46.92	61	367	NaN	541	80	234	30	NaN	22	36	8.371	-4.942	-0.855	0.822	1.66	0.952	-1.389	0.713	2.219	-2.394	3.165	1.573	-5.834	-1.995	-1.015	2.19	0.755	NaN
1041	9.2	1	6	1	36	68	165	NaN	203	70	169	43	85	53	63	9.375	-3.971	-3.024	0.305	0.206	2.63	-2.699	0.122	3.003	-1.169	2.28	2.091	-4.956	-1.087	-0.006	2.895	1.41	NaN
1042	7	1	5	1	42.28	67	148	NaN	397	50	197	42	76	66	68	9.107	-5.431	-2.168	-1.366	0.692	1.455	-1.39	1.188	2.007	-1.873	2.413	2.344	-4.562	-1.573	-2.788	-1.153	0.578	10.875
1043	6.7	1	4	2	57.23	47	107	131.262	NaN	40	NaN	NaN	NaN	18	34	9.436	-5.003	-2.761	-0.359	0.573	1.755	-2.61	0.097	2.033	-1.717	1.595	1.728	-6.056	-2.526	-1.555	1.857	-0.072	9.104
1044	9.7	1	0	1	41.98	72	180	84.377	354	50	124	41	12	20	25	10.552	-4.444	-1.894	0.229	0.04	2.023	-2.951	-0.388	2.308	-1.749	0.892	1.599	-7.469	-2.784	-1.09	1.927	0.707	7.452
1046	9.2	1	NaN	2	44.7	42	113	49.971	386	50	263	29	157	211	100	9.917	-2.802	-2.386	1.827	1.53	2.634	-1.912	0.631	2.256	-1.597	3.339	1.69	-4.618	-0.819	-0.086	5.494	0.759	10.045
1051	9.6	1	5	1	43.44	50	234	NaN	121	40	170	61	85	23	39	11.008	-3.647	-1.475	0.298	0.996	1.789	-1.962	0.309	2.612	-1.307	2.368	1.238	-4.849	-2.461	-1.363	0.998	1.503	9.205
1052	7.2	1	4	1	38.34	47	260	70.217	300	40	140	24	56	17	40	9.804	-1.937	-0.335	0.842	2.458	1.077	-1.654	-0.013	1.886	-1.913	1.724	1.761	-6.667	-3.813	-0.275	3.221	0.325	6.477
1054	5.6	1	4	2	55.36	22	84	99.298	117	10	154	43	88	16	23	11.01	-0.749	-2.758	1.173	0.562	4.336	-2.882	-0.572	2.829	-1.462	2.008	1.991	-4.591	-2.259	0.918	NaN	1.714	4.634
1056	11.1	1	3	2	68.68	43	252	24.842	152	15	111	37	44	18	19	8.945	-2.874	-0.511	0.634	2.992	1.679	-1.437	1.604	2.93	-1.693	2.227	2.321	-4.912	-1.341		3.223	0.931	4.516
1061	6.6	1	NaN	2	46.65	52	103	145.518	381	NaN	243	40	127	21	30	10.628	-1.856	-0.64	1.652	1.406	3.717	-1.691	0.791	2.309	-1.266	3.034	1.565	-4.04	0.023	0.958	4.243	1.138	7.355
1063	7.1	1	2	2	32.93	51	134	36.539	150	5	233	45	158	13	12	11.441	-3.916	-0.27	1.095	1.998	1.439	-1.816	0.31	2.871	-2.212	1.339	0.754	-6.287	-2.541	-1.487	2.239	-0.588	9.505
1068	10.5	1	NaN	1	57.39	51	329	NaN	224	50	185	33	107	14	25	10.792	-2.745	-2.086	0.578	0.707	1.71	-2.745	0.065	2.3	-1.503	0.795	2.151	-5.499	-2.934	-0.359	2.194	1.69	NaN
1070	6.5	1	3	1	58.27	31	88	80.834	84	35	109	41	51	46	51	11.068	-4.051	-1.062	0.428	1.763	1.178	-2.073	0.129	2.825	-2.285	0.718	1.394	-6.553	-3.364	-0.939	3.18	0.62	9.52
1073	6.7	1	NaN	1	47.1	51	95	310.649	298	10	170	44	66	17	21	11.764	-4.066	-2.239	0.032	0.565	1.887	-1.891	-0.19	2.898	-1.652	0.718	0.998	-6.028	-2.689	-2.541	-0.081	0.843	8.733
1074	5.3	1	0	2	36.22	35	89	50.481	104	10	236	51	164	16	22	10.589	-1.734	0.692	1.083	1.81	1.314	-2.565	-0.297	2.919	-2.056	0.778	0.897	-6.331	-3.056	-0.714	3.806	-0.019	5.84
1081	6.5	1	NaN	2	45.18	59	86	74.479	192	60	185	67	80	71	63	9.956	-5.078	-0.659	0.483	1.523	1.614	-1.933	0.144	2.44	-1.751	1.491	1.679	-5.417	-2.932	-1.233	2.964	1.267	NaN
1082	8	1	6	2	56	58	136	28.885	545	60	206	27		29	46	11.088	-5.376	-1.874	-0.372	0.714	2.318	-2.085	0.379	2.576	-1.507	1.489	1.771	-4.279	-0.639	-2.869	0.185	0.795	NaN
1083	7.4	1	6	2	63.14	48	125	222.89	157	40	137	35	71	72	69	8.751	-3.796	-1.226	1.398	2.077	1.786	-1.882	0.209	2.732	-1.631	1.534	1.602	-4.629	-2.291	-1.288	2.716	0.4	6.932
1084	6.9	1	6	2	60.23	56	159	NaN	172	40	203	49	120	79	76	8.906	-4.641	-1.129	0.872	1.933	1.87	-1.453	1.184	2.707	-2.133	2.211	1.575	-3.365	-1.144	-0.902	3.424	0.418	NaN
1087	10.1	1	4	2	48.63	33	173	54.716	212	NaN	134	39	53	44	35	9.278	-5.909	-2.175	0.927	2.009	2.112	-1.038	0.819	3.312	-2.15	1.806	1.633	-5.231	-2.825	-2.263	0.97	0.05	8.096
1089	6.3	1	NaN	2	67.77	37	NaN	106.629	NaN	NaN	NaN	NaN	NaN	NaN	NaN	11.374	-3.519	-0.57	1.104	2.3	0.959	-2.182	0.162	3.201	-2.187	1.644	1.606	-6.256	-2.732	-1.065	4.349	0.327	NaN
1091	9.2	1	5	2	57.14	55	273	308.808	235	70	188	51	90	35	40	8.579	-4.39	-2.28	0.193	1.43	1.839	-1.827	0.468	2.633	-1.793	1.464	1.88	-5.286	-2.121	-0.713	2.187	0.183	6.696
1092	7.5	1	2	1	54	62	121	264.393	341	40	171	35	68	17	23	10.409	-2.664	-3.465	-0.276	-0.23	NaN	-3.213	1.019	4.467	-1.47	1.26	2.025	-4.553	-0.511	0.114	NaN	3.946	6.691
1097	9.2	1	2	2	47.75	58	217	36.504	611	40	214	24	NaN	18	24	8.576	-1.301	-2.349	1.142	0.613	3.275	-2.651	-0.538	2.927	-0.726	1.728	1.308	-6.154	-1.787	0.954	5.99	2.686	NaN
1098	9.2	1	5	2	74.84	45	279	62.791	253	60	233	50	132	28	37	10.685	-3.62	-2.816	-0.229	1.334	3.552	-2.013	0.186	2.953	-1.858	1.736	1.497	-5.347	-2.4	-1.202	3.736	0.741	8.591
1099	10.6	1	2	2	60.06	53	219	104.95	184	20	177	65	75	23	26	11.371	-3.208	-1.854	0.25	1.244	1.807	-2.146	-0.223	2.549	-1.72	1.204	1.68	-5.121	-2.194	-0.882	2.217	0.086	NaN
1101	6.3	1	NaN	2	40.52	47	NaN	220.582	NaN	NaN	NaN	NaN	NaN	NaN	NaN	9.967	-3.419	-2.41	0.155	0.588	3.405	-2.564	0.188	3.02	-1.518	NaN	1.738	-5.894	-2.772	-0.194	5.021	1.639	6.196
1103	7	1	1	2	38	55	113	28.059	70	NaN	198	67	117	19	23	11.883	-1.383	-2.891	1.326	-0.575	NaN	-4.15	NaN	4.28	NaN	NaN	1.996	-5.685	-0.661	1.51	NaN	3.621	5.962
1105	10	1	6	2	47.4	58	230	31.153	114	70	144	34	87	50	36	8.383	NaN	-2.204	0.623	1.636	1.951	NaN	NaN	2.431	NaN	NaN	NaN	-5.474	-2.287	-1.409	2.692	1.177	2.73
