# Supplementary material for: Liver microRNA transcriptome reveals miR-182 as link between type 2 diabetes and fatty liver disease in obesity
Source: eLife. 2024 Jul 22;12:RP92075. doi: 10.7554/eLife.92075 (PMC11262792; doi:10.7554/eLife.92075)
Supplement: Figure 3—source data 1. [file elife-92075-fig3-data1.xlsx]

## Sheet: Sheet1
Group	insulin	TAG_hep	leptin	body_weight	NEFA	TAG	chol	mmu_miR_182_5p_dCT	mmu_miR_149_5p_dCT	mmu_miR_330_3p_dCT	mmu_miR_1962_dCT	mmu_miR_7056_5p_dCT	Scd1_dCT	Fasn_dCT	Elovl6_dCT	Acaca_dCT	Pnpla2_dCT	Ppara_dCT	Lrp6_dCT	Pdk1_dCT	Insr_dCT	Irs1_dCT	Foxo1_dCT	Pck1_dCT	G6pc_dCT	Dhcr7_dCT	Hmgcs1_dCT	Insig1_dCT
C1	3.60149	2.96	26.1	34	0.356	45.435	69	-8.50082	-6.39458	-10.9534	-6.93573	-8.24049	5.8592	-1.77519	-0.855551	-0.707834	-0.304763	1.58467	0.108188	-0.78983	-1.47804	-2.1621	0.0424218	4.31311	1.18163	2.73964	-0.666111	1.72753
C2	3.12456	2.62	741.6	38.5	0.374	62.314	70.8	-8.68409	-4.02151	-10.4662	-6.92816	-8.18659	6.47728	-0.454856	-0.972438	-0.462739	0.304142	1.76548	0.394642	-0.222322	-1.47247	-2.28279	0.429761	4.65864	0.987137	2.26172	-1.27036	0.974305
C3	4.31977	2.77	252.1	39	0.522	71.722	78.9	-8.43371	-4.92785	-10.163	-6.9131	-8.07745	5.77927	-0.75748	-0.848825	-0.566653	0.8837	1.9272	0.37051	-0.528604	-1.43725	-2.54012	-0.0673705	4.41135	1.42873	2.05757	-2.03811	0.323889
C4	2.86023	3.46	NaN	45.2	0.402	87.771	80.1	-8.6249	-3.83008	-11.1281	-7.84591	-8.73649	6.24298	-0.00815463	-0.363655	-0.720429	0.0581894	1.58975	-0.123594	-0.243376	-1.73469	-2.48624	0.116746	3.74006	1.28155	2.64849	-1.28656	0.899402
C5	2.34882	2.62	228.5	37	0.457	50.969	75.6	-8.20863	-4.82185	-10.4269	-6.75447	-8.55529	5.96176	-0.862914	-0.80283	-0.142486	0.0537177	1.66121	-0.0184754	-1.04595	-1.64799	-2.45652	-0.333072	3.52248	0.733523	2.16068	-2.26647	0.677455
C7	5.26789	2.08	269.5	35.1	0.595	58.994	76	-8.51967	-4.87959	-10.3369	-6.22894	-8.07296	5.86332	-0.846605	-0.721395	-0.0427546	0.551472	1.89283	0.15307	-0.758032	-1.48961	-2.25049	-0.00251527	3.67602	0.789779	2.1035	-1.32285	0.337861
C8	2.12472	2.14	33.9	29.8	0.558	19.147	70.8	-8.29533	-5.71058	-11.0093	-6.58059	-7.98195	6.29868	-0.762057	-0.817994	-0.0941595	0.627991	1.54563	0.257782	-0.618264	-1.12507	-2.00435	0.28236	4.36486	1.07684	2.14782	-1.51273	0.663573
H1	11.8574	4.55	2968.7	64.3	0.42	56.503	218.1	-7.53597	-3.76124	-11.3788	-7.75506	-8.35691	6.8547	-0.00242333	-1.07184	-0.0584542	-0.209833	1.64576	-0.305517	-0.738943	-1.86235	-3.49796	-0.179391	2.04116	1.18994	2.07903	-1.85585	0.702823
H2	8.76595	4.66	2644.7	53.6	0.402	49.032	168.4	-7.91677	-3.40246	-10.4884	-7.84456	-8.61055	6.1572	-0.0244516	-1.09074	-0.615772	-0.0458811	0.829869	-0.340656	-1.13028	-2.03532	-3.80581	-0.275295	1.54842	-0.589045	1.76653	-2.34888	1.00299
H3	5.78942	4.53	3386.9	59	0.439	62.037	195.7	-7.45182	-3.04999	-11.2602	-8.66515	-9.09056	6.35378	-0.486042	-1.3253	-0.840955	0.232621	1.02783	-0.442003	-0.844009	-2.09032	-3.5692	-0.243167	1.26504	0.486447	2.09494	-2.327	1.11729
H4	14.719	3.68	2683.9	57.9	0.402	59.824	180.7	-7.56435	-3.09867	-10.5599	-8.14382	-8.83015	6.22923	-0.411499	-1.14086	-0.66922	0.445599	0.975549	-0.192292	-0.906673	-2.1296	-3.75732	-0.407963	2.16514	0.248806	1.21639	-2.49811	0.33894
H5	12.3401	4.2	3046.3	59.4	0.365	44.881	172.7	-7.15764	-3.28006	-10.9198	-8.70378	-9.53616	6.56764	-0.751213	-1.42285	-0.725729	-0.115925	0.887903	-0.412319	-0.960145	-2.06036	-3.86488	-0.236701	1.31876	0.153045	1.74756	-2.1428	1.17984
H7	5.01943	2.71	3496.6	55.3	0.522	83.621	249.3	-7.4968	-3.75583	-11.2028	-9.05027	-9.85008	6.75697	-0.521151	-0.844832	-0.00158274	0.176832	1.25995	-0.186274	-0.680413	-1.84	-3.36294	0.111334	1.59712	0.989534	1.72895	-2.11783	1.11509
HC1	2.46949	1.81	NaN	36.3	0.291	47.925	48.4	-7.9199	-5.42944	-11.2508	-8.46367	-10.0367	5.24928	-1.22971	-1.29798	-0.135704	-0.200161	0.209334	0.180629	-1.16804	-1.94019	-3.2343	0.604275	2.83508	1.05441	1.6154	-1.77667	0.948331
HC2	1.94659	2.44	242	42.6	0.346	38.794	49	-7.92656	-4.33056	-10.5626	-7.28025	-8.93609	5.07218	-1.75906	-0.490455	-0.204593	-0.118185	0.923541	0.247955	-0.260835	-1.71022	-3.15552	0.293728	1.70562	1.55803	1.87609	-2.17908	0.209769
HC3	2.54419	2.18	115.1	34.6	0.337	47.095	63.3	-7.84252	-4.68923	-10.7297	-7.27473	-9.02714	3.67863	-2.91305	-2.28139	-1.59382	-0.991708	-0.143445	-0.219532	-1.1917	-2.22308	-4.11742	0.101231	1.34606	1.66698	2.56446	-1.84985	0.563203
HC4	4.76797	3.19	149.1	36.8	0.402	47.095	66.3	-8.2486	-3.15186	-10.1998	-7.30254	-9.42957	6.23259	-0.504438	-0.833151	-1.01943	-0.685059	1.26491	-0.211512	-0.975829	-1.85266	-3.02023	-0.0955762	3.58788	0.35282	1.93135	-1.73706	0.741571
HC6	3.23948	2.95	1377.2	47	0.485	78.363	68	-7.94663	-2.88194	-9.71193	-6.30522	-9.03227	6.57842	-0.144782	-0.5549	-0.250113	0.049247	1.17848	-0.0769146	-0.247018	-1.66103	-2.89939	-0.0248602	3.41058	0.124471	2.04286	-1.62379	0.754704
HC7	5.63564	4.12	705	47.3	0.577	78.917	70.2	-8.40094	-3.46729	-10.1291	-6.69948	-9.09912	6.21155	-0.641518	-0.896715	-0.961773	-0.0584652	1.45978	0.00584963	-0.718296	-1.88499	-2.97089	-0.489389	3.00607	1.03203	2.05779	-1.07096	0.724109
HC8	5.71034	2.03	1172.8	47.3	0.531	63.144	75.6	-7.87218	-2.96792	-10.0817	-6.80989	-9.25094	5.27399	-1.21448	-0.907532	-0.796993	-0.148759	1.53861	-0.257211	-0.780382	-2.50765	-3.28336	-0.390808	3.30171	1.43272	2.45783	-1.25471	0.711379
HC10	5.54371	2.4	984.9	44.9	0.42	59.824	86.1	-8.33679	-3.10106	-10.4102	-6.27593	-8.67193	6.45821	-0.444815	-0.289021	-0.50137	0.244851	1.48489	-0.179122	-0.160799	-1.75616	-3.70536	0.0476013	3.37204	1.67907	1.52606	-1.66812	0.216833
YoYo1	16.19	3.62	3722.3	53.2	0.393	64.804	137.7	-7.47683	-2.7047	-9.74619	-6.45159	-8.5454	7.03081	-0.454281	-1.03194	-0.557412	-0.0165402	1.43816	-0.331303	-0.569771	-1.94127	-3.82848	-0.472687	1.5097	-0.35662	0.587955	-3.23242	-0.0803379
YoYo2	8.65102	4.08	4020.6	61.5	0.374	59.824	198.1	-7.47004	-2.96261	-10.0013	-6.54664	-8.6747	6.15286	-0.236561	-1.35507	-0.737832	0.097426	1.27216	-0.448239	-0.742731	-2.09524	-3.60936	-0.436216	1.45163	0.356071	1.57948	-2.32773	0.892537
YoYo3	12.9837	3.41	3324.1	61.7	0.356	73.382	183	-7.39914	-3.41743	-10.9928	-8.21698	-9.18053	6.79062	0.565916	-0.575689	-0.547282	0.641972	1.58136	-0.12125	-0.533061	-2.08669	-3.66871	-0.289794	1.30571	1.07712	1.05061	-2.57286	0.0097228
YoYo4	11.2253	4.14	3690.1	60.9	0.429	66.465	180.1	-7.4287	-3.03115	-10.7139	-8.28676	-9.16292	6.60188	-0.815157	-1.13347	-0.963783	0.324833	0.986513	-0.357197	-0.437792	-2.27528	-3.91068	-0.337525	0.703294	0.544151	1.98518	-2.44805	1.29801
YoYo5	21.7179	4.32	4986.7	71.5	0.42	90.539	210.7	-7.61753	-3.35732	-10.6072	-7.79067	-8.80796	6.19815	-0.20054	-1.51947	-1.10857	-0.132868	0.427047	-0.865112	-1.26434	-2.62585	-3.86942	-0.791083	0.264123	-0.266823	2.23728	-1.38958	0.559214
YoYo7	12.1677	3.89	4232.3	63.7	0.411	58.994	203.8	-7.51189	-3.56878	-10.4815	-7.88239	-9.10462	6.16207	-1.03042	NaN	NaN	NaN	0.91151	NaN	NaN	-2.35656	-3.69033	-0.248935	1.01762	NaN	NaN	NaN	NaN
YoYo8	19.247	3.23	3926.2	69.5	0.429	85.281	226.6	-7.49318	-3.37184	-10.3567	-7.98999	-8.95863	6.6365	-0.128399	-1.06677	-0.48025	0.255071	1.20872	-0.231619	-0.936335	-2.26102	-3.86083	-0.260182	1.16423	0.578204	1.99916	-1.70369	1.30325
YoYo10	13.5813	4.06	3331.6	57.7	0.365	52.076	183.2	-6.99364	-2.98154	-10.1114	-7.51817	-8.57704	6.45096	-0.821405	-0.522049	-0.496167	0.130136	1.50017	-0.537355	-0.85739	-2.1297	-3.88121	-0.281559	2.07623	0.894285	0.94593	-3.30269	0.360485
YoYo11	12.2596	3.96	3690.7	60.7	0.448	55.95	187.6	-6.79915	-3.32613	-9.9452	-7.36295	-8.14498	6.72395	-0.679779	-0.228309	-0.0515942	0.328585	1.6718	-0.0719533	-0.35692	-1.69069	-3.03936	-0.109573	1.38023	0.824498	1.44339	-2.98431	0.808675
