# Supplementary material for: Liver microRNA transcriptome reveals miR-182 as link between type 2 diabetes and fatty liver disease in obesity
Source: eLife. 2024 Jul 22;12:RP92075. doi: 10.7554/eLife.92075 (PMC11262792; doi:10.7554/eLife.92075)
Supplement: Figure 4—source data 2. [file elife-92075-fig4-data2.xlsx]

## Sheet: Sheet1
MouseID	RNA_ID	Group	Group_code	Lrp6_Hsp90	Insulin_0	Insulin_5	Insulin_15	Insulin_AUC	BW_d5	Glc_0_d5	Glc_5_d5	Glc_15_d5	Glc_30_d5	Glc_60_d5	Glc_120_d5	Glc_AUC_d5	TG[ng/mgTissue]	miR-182-5p	Mm_Acaca	Mm_Elovl6	Mm_Insr	Mm_Lrp6	Mm_Ppara	Mm_FASN	Mm_Foxo1	Mm_Gpc	Mm_Irs1	Mm_Pdk1	Mm_Pnpla2	Mm_Dhcr7	Mm_Hmgcs1	Mm_Insig1	Mm_Pck1	Mm_Scd1
31	miR21	nc	0	3.43576	1.438	1	0.848	15.34	27.9	93	160	288	299	273	169	29115	2.41455	1.05372	1.0202	1.10664	1.26354	1.37834	0.986868	1.34166	1.20607	1.88921	1.49308	1.29574	1.41006	1.68916	1.62457	1.47183	1.49754	0.589194
32	miR22	nc	0	2.17109	2.772	1.298	1.596	24.65	26.3	104	140	304	298	335	159	31660	1.49774	0.874914	1.30471	1.09991	1.16404	1.18587	1.17125	1.31568	1.29964	1.14539	1.38836	1.15492	1.64702	1.41616	1.20468	0.920589	0.990303	1.13307
37	miR27	nc	0	2.79731	1.306	1.062	0.612	14.29	27.4	98	115	228	315	271	93	26030	1.72317	0.933179	0.903249	0.815967	0.878641	0.772439	0.570445	0.781121	0.582068	0.777522	0.706462	0.627652	0.59481	0.745882	0.76475	0.921175	0.634218	0.343024
38	miR28	nc	0	1.46207	0.79	1.202	1.94	20.69	30.2	103	124	225	251	250	84	23418	2.1668	NaN	0.696045	0.836566	0.663439	0.8963	0.734777	1.04787	1.08406	1.16244	0.928426	0.897619	0.972011	0.842721	0.898752	0.721552	0.769433	1.08175
43	miR32	nc	0	1.16968	0.57	NaN	0.942	11.34	26.4	114.5	141	267	242	250	159	26108	1.50502	0.696879	0.934472	1.87708	1.22831	0.920956	1.2831	0.933137	0.773303	0.634021	0.593491	1.27959	1.00953	1.16586	1.38854	1.81853	0.754921	1.08972
44	miR33	nc	0	1.77778	1.278	1.13	0.96	16.47	28.3	118	278	220	391	222	124	27600	2.00336	1.5583	0.848471	0.653618	0.980765	0.799267	1.05675	0.573433	0.684379	0.304218	0.581642	0.467555	0.435531	0.344475	0.559744	0.223596	0.268676	0.163409
47	miR36	nc	0	1.2848	0.524	0.596	0.936	10.46	30.2	115	131	186	287	208	130	23285	1.27249	0.508694	0.987407	0.505303	0.691289	0.789999	0.835624	0.8192	1.05649	1.09058	0.985394	0.83026	0.605202	0.371132	0.596951	0.357407	0.877698	1.29079
48	miR37	nc	0	NaN	1.068	1.32	1.428	19.71	30.1	108	120	201	213	150	80	17625	3.05843	1.18569	1.30545	1.10491	1.12997	1.25684	1.36118	1.18791	1.31398	0.996619	1.32314	1.44667	1.32584	1.4246	0.962012	1.56531	2.20721	2.30904
33	miR23	miR	1	1.08481	1.24	0.92	1.446	17.23	24.7	112.5	82	238	283	239	93	23728	8.2865	546.159	1.39082	1.69861	0.952093	0.936453	1.01446	0.978819	0.808069	0.780907	0.95596	1.69413	1.17018	1.22289	1.78718	1.49798	0.884373	2.90229
34	miR24	miR	1	1.25241	1.866	0.3	0.92	11.52	27.6	106.5	150	200	303	327	107	28135	2.5229	567.783	1.11847	1.40373	0.720376	0.812454	0.698263	0.817646	0.656157	0.727458	0.474958	1.02504	1.11584	1.05912	2.28187	0.935922	0.63465	1.35412
35	miR25	miR	1	1.06659	1.044	0.658	1.542	15.26	27.2	85	100	257	268	207	87	22130	3.6166	595.258	1.12646	1.21662	1.06177	0.935507	0.764143	0.736971	0.952091	0.560498	0.646829	1.01167	1.16732	1.31586	1.29685	0.935727	0.802517	1.32188
36	miR26	miR	1	2.17162	1.778	1.56	1.372	23.01	28.9	96	119	275	386	356	143	33565	2.63645	431.551	0.571733	0.418841	0.640395	0.634129	0.368111	0.528054	0.568738	0.184131	0.340576	0.494163	0.576798	0.596974	1.07202	0.278929	0.346284	0.759693
41	miR30	miR	1	0.755218	3.454	2.012	1.048	28.97	30.9	108	147	209	310	254	107	25600	3.47435	646.267	1.3565	2.49266	1.27819	1.05888	1.35077	0.791661	0.739323	0.746982	0.99937	1.56962	0.73728	1.60972	1.29046	2.17586	1.30143	2.84618
45	miR34	miR	1	0.552283	NaN	0.588	1.186	8.87	29.8	93	111	172	301	255	108	24703	3.08832	537.095	0.412756	0.173595	0.39863	0.328012	0.247996	0.139041	0.23029	0.0992258	0.336906	0.243538	0.0820048	0.0986373	0.076415	0.0439683	0.192174	0.144758
46	miR35	miR	1	0.855713	1.062	NaN	0.864	14.45	26.8	86	100	159	230	271	139	23143	4.69569	678.619	1.04374	0.861645	0.532718	0.578684	0.552254	0.478431	0.464174	0.553872	0.32435	0.748019	0.382901	0.346714	0.995889	0.339832	0.360888	0.714561
49	miR38	miR	1	0.706832	2.614	1.926	2.6	33.98	31.8	111	196	282	255	304.5	180	29655	5.92576	542.111	1.40095	1.52012	1.1597	1.14501	1.4007	1.15579	1.11592	0.740502	1.17641	1.53488	1.09386	1.25644	1.07052	2.3816	1.83096	2.89571
