# Supplementary material for: Liver microRNA transcriptome reveals miR-182 as link between type 2 diabetes and fatty liver disease in obesity
Source: eLife. 2024 Jul 22;12:RP92075. doi: 10.7554/eLife.92075 (PMC11262792; doi:10.7554/eLife.92075)
Supplement: Supplementary file 1. — A rank sum test was performed to find significant differences between both subgroups. [file elife-92075-supp1.xlsx]

## Sheet: Supplementary File 1a
Supplementary File 1: Clinical Characteristics for the complete (n=85) and microarray (n=40) obese human liver cohort. A ranksum test was performed to find significant differences between both subgroups.
	ND (n=44) all			ND (n=20) microarray			T2D (n=41) all			T2D (n=20) microarray			ranksum test complete cohort	ranksum test microarray
	Mean	SD	Count				Mean	SD	Count
Diagnosed (yes/no)	0/44		44	0/20		20	36/5			20/0		20	NA	NA
T2D by ADA-HbA1c (yes/no)	0/44		44	0/20		20	35/6			20/0		20	NA	NA
HbA1c (%)	5.14545	0.365013	44	5.195	0.318551	20	7.99512	1.69203	41	8.64	1.48641	20	***	***
NAS (score)	1.90244	1.94685	41	2.5	2.24722	20	3.71875	1.98761	32	4.15	1.52561	20	***	*
Sex	m=7/w=37		44	m=7/w=13		20	m=14/w=27		41	m=8/w=12		20	n.s.	n.s.
BMI (kg/m2)	54.1543	11.5389	44	55.052	12.4222	20	50.4315	9.52136	41	54.0055	8.09281	20	n.s.	n.s.
Age (years)	37.7273	10.7884	44	45.15	9.07345	20	50.1463	11.8185	41	50.75	9.55968	20	***	n.s.
fasting glucose (mg/dL)	95.2045	16.8269	44	98.5	21.4581	20	172.051	74.1765	39	198.75	71.3427	20	***	***
serum insulin (pmol/L)	74.2874	51.602	42	90.0739	55.9015	19	169.085	195.793	36	140.607	125.273	16	*	n.s.
cholesterol (mg/dL)	185.767	32.5517	43	191.15	29.7981	20	191.158	49.6847	38	186.895	56.653	19	n.s.	n.s.
serum triglycerides (mg/dL)	166.814	76.1441	43	224.6	120.065	20	258.5	135.626	38	266.263	145.208	19	***	n.s.
HDL (mg/dL)	46.6279	11.9324	43	42.6	10.693	20	42.6842	13.509	38	40.7895	13.6558	19	n.s.	n.s.
LDL (mg/dL)	105.762	31.5755	42	104.947	29.038	19	95.1212	38.289	33	86.3333	29.4317	15	n.s.	n.s.
hepatic lipid content (%)	22.9722	24.8969	36	32.6	24.3907	15	40.3235	21.1183	34	43.9444	20.4001	18	***	n.s.
AST (U/L)	21.25	11.3796	44	27.5	17.2902	20	36.4359	34.5473	39	32.4	18.5779	20	**	n.s.
ALT (U/L)	27.75	18.9714	44	36.35	27.5758	20	37.359	18.9716	39	34.95	12.8549	20	**	n.s.
CRP (mg/L)	14.3864	11.1276	44	13.75	10.0343	20	16.6842	14.8089	38	19.25	16.9555	20	n.s.	n.s.
TSH (mU/L)	2.21192	1.21862	40	1.92684	0.801248	19	2.79424	7.30564	37	3.9558	9.62776	20	n.s.	n.s.
Cortisol (nmol/L)	114.55	52.7125	40	93.8947	37.8082	19	145.778	57.8471	36	150.45	52.0322	20	*	***
Vitamin B12 (pmol/L)	509.825	320.495	40	538.105	368.746	19	593.917	319.399	36	533.263	195.115	19	n.s.	n.s.
folic acid (ng/mL)	5.975	3.87819	40	6.94737	5.09885	19	8.73611	5.38979	36	8.43158	5.10491	19	**	n.s.+
Abbrevations: ADA, American Diabetes Association; ALT, Alanine transaminase; AST, Aspartate transaminase; BMI, Body mass index; CRP, C-reactive protein; HDL, high density lipoprotein; LDL, low density lipoprotein; m, men; NAS, NAFLD acitivity score; ND, non-diabetic; T2D, type 2 diabetic; TSH, thyroid stimulating hormone; w, women;
Group differences were tested by comparing ranks using the nonparametric Mann-Whitney test. Significane is indicated as n.s.p > 0.05; *p<0.05; **p<0.01; ***p<0.001. The microarray sub-cohort is part of the complete cohort.
