# Supplementary material for: Liver microRNA transcriptome reveals miR-182 as link between type 2 diabetes and fatty liver disease in obesity
Source: eLife. 2024 Jul 22;12:RP92075. doi: 10.7554/eLife.92075 (PMC11262792; doi:10.7554/eLife.92075)
Supplement: Supplementary file 2. [file elife-92075-supp2.xlsx]

## Sheet: Tabelle1
Supplementary File 2: Primer sequences for SYBR-green analysis of cDNA by qPCR and cloning
Application	Gene	Species	Orientation	Sequence
mRNA quantification by qPCR	CASC3	Human	forward	ACCTCGGAAAGGGCTCTTCTT
mRNA quantification by qPCR	CASC3	Human	reverse	CGACCCTCATCCTTCCATAGC
mRNA quantification by qPCR	INSR	Human	forward	AAAACGAGGCCCGAAGATTTC
mRNA quantification by qPCR	INSR	Human	reverse	GAGCCCATAGACCCGGAAG
mRNA quantification by qPCR	Acaca	Mouse	forward	ATGGGCGGAATGGTCTCTTTC
mRNA quantification by qPCR	Acaca	Mouse	reverse	TGGGGACCTTGTCTTCATCAT
mRNA quantification by qPCR	Dhcr7	Mouse	forward	AGGCTGGATCTCAAGGACAAT
mRNA quantification by qPCR	Dhcr7	Mouse	reverse	GCCAGACTAGCATGGCCTG
mRNA quantification by qPCR	Hmgcs1	Mouse	forward	AACTGGTGCAGAAATCTCTAGC
mRNA quantification by qPCR	Hmgcs1	Mouse	reverse	GGTTGAATAGCTCAGAACTAGCC
mRNA quantification by qPCR	Insig1	Mouse	forward	CACGACCACGTCTGGAACTAT
mRNA quantification by qPCR	Insig1	Mouse	reverse	TGAGAAGAGCACTAGGCTCCG
mRNA quantification by qPCR	Elovl6	Mouse	forward	GAAAAGCAGTTCAACGAGAACG
mRNA quantification by qPCR	Elovl6	Mouse	reverse	AGATGCCGACCACCAAAGATA
mRNA quantification by qPCR	Fasn	Mouse	forward	GCCCCTTCAGTTGTGAGTCAT
mRNA quantification by qPCR	Fasn	Mouse	reverse	AGAGCGTTGCCGTATTCGTC
mRNA quantification by qPCR	Foxo1	Mouse	forward	GAGGTGGTCGAGTTGGACTG
mRNA quantification by qPCR	Foxo1	Mouse	reverse	CGCTGCAGATCCCGTAAGAC
mRNA quantification by qPCR	G6pc	Mouse	forward	TCTGTCCCGGATCTACCTTG
mRNA quantification by qPCR	G6pc	Mouse	reverse	GAAAGTTTCAGCCACAGCAA
mRNA quantification by qPCR	Insr	Mouse	forward	CGAGTGCCCGTCTGGCTATA
mRNA quantification by qPCR	Insr	Mouse	reverse	GGCAGGGTCCCAGACATG
mRNA quantification by qPCR	Irs1	Mouse	forward	CGATGGCTTCTCAGACGTG
mRNA quantification by qPCR	Irs1	Mouse	reverse	CAGCCCGCTTGTTGATGTTG
mRNA quantification by qPCR	Scd1	Mouse	forward	TTCTTGCGATACACTCTGGTGC
mRNA quantification by qPCR	Scd1	Mouse	reverse	CGGGATTGAATGTTCTTGTCGT
mRNA quantification by qPCR	Lrp6	Mouse	forward	TTGTTGCTTTATGCAAACAGACG
mRNA quantification by qPCR	Lrp6	Mouse	reverse	GTTCGTTTAATGGCTTCTTCGC
mRNA quantification by qPCR	Pck1	Mouse	forward	CTGCATAACGGTCTGGACTTC
mRNA quantification by qPCR	Pck1	Mouse	reverse	CAGCAACTGCCCGTACTCC
mRNA quantification by qPCR	Pdk1	Mouse	forward	GGACTTCGGGTCAGTGAATGC
mRNA quantification by qPCR	Pdk1	Mouse	reverse	TCCTGAGAAGATTGTCGGGGA
mRNA quantification by qPCR	Pnpla2	Mouse	forward	GGATGGCGGCATTTCAGACA
mRNA quantification by qPCR	Pnpla2	Mouse	reverse	CAAAGGGTTGGGTTGGTTCAG
mRNA quantification by qPCR	Ppara	Mouse	forward	TACTGCCGTTTTCACAAGTGC
mRNA quantification by qPCR	Ppara	Mouse	reverse	AGGTCGTGTTCACAGGTAAGA
mRNA quantification by qPCR	Hprt1	Mouse	forward	AAGCTTGCTGGTGAAAAGGA
mRNA quantification by qPCR	Hprt1	Mouse	reverse	TTGCGCTCATCTTAGGCTTT
miRNA quantification by qPCR	miR-182-5p	Human/mouse	forward	GCTTTGGCAATGGTAGAACTCA
miRNA quantification by qPCR	miR-24-3p	Human/mouse	forward	TGGCTCAGTTCAGCAGGAACA
miRNA quantification by qPCR	miR-149-5p	Mouse	forward	TCTGGCTCCGTGTCTTCACT
miRNA quantification by qPCR	miR-330-3p	Mouse	forward	CAAAGCACACGGCCT
miRNA quantification by qPCR	miR-1962	Mouse	forward	GCTGGCACTGGGACA
miRNA quantification by qPCR	miR-7056-5p	Mouse	forward	TGTGGAGGAGGACAGAGA
miRNA quantification by qPCR	cel-miR-39-3p		forward	CACCGGGTGTAAATCAGCTTG
miRNA quantification by qPCR	universal		reverse	GCATAGACCTGAATGGCGGTA
cloning	LRP6	human	forward	ATCTCTCGAGCACATGTGTAGCACTTCTCTGCT
cloning	LRP6	human	reverse	TGCGGCCGCGACACTGTGGGCACTTAGTT
site-directed mutagenesis	LRP6	human	sense	CTTTTTTAATTCTGTCTTGACAAGGCCTCTCTGGGTTTC
site-directed mutagenesis	LRP6	human	antisense	GAAACCCAGAGAGGCCTTGTCAAGACAGAATTAAAAAAG
