# Supplementary material for: Liver microRNA transcriptome reveals miR-182 as link between type 2 diabetes and fatty liver disease in obesity
Source: eLife. 2024 Jul 22;12:RP92075. doi: 10.7554/eLife.92075 (PMC11262792; doi:10.7554/eLife.92075)
Supplement: Supplementary file 3. [file elife-92075-supp3.xlsx]

## Sheet: Tabelle1
Supplementary File 3: Assay-IDs for TaqManTM Gene-expression Assays
Application	Gene	Species	Assay-ID
mRNA quantification by qPCR	CASC3	human	Hs00201226_m1
mRNA quantification by qPCR	ACACA	human	Hs01046047_m1
mRNA quantification by qPCR	G6PC	human	Hs00609178_m1
mRNA quantification by qPCR	IRS1	human	Hs00178563_m1
mRNA quantification by qPCR	SCD	human	Hs01682761_m1
mRNA quantification by qPCR	LRP6	human	Hs00233945_m1
mRNA quantification by qPCR	PCK1	human	Hs00159918_m1
mRNA quantification by qPCR	PDK1	human	Hs01561847_m1
mRNA quantification by qPCR	PNPLA2	human	Hs00386101_m1
mRNA quantification by qPCR	PPARA	human	Hs00947536_m1
miRNA quantification by qPCR	miR-182-5p	human	477935_mir
miRNA quantification by qPCR	miR-24-3p		477992_mir
