# Supplementary material for: Liver microRNA transcriptome reveals miR-182 as link between type 2 diabetes and fatty liver disease in obesity
Source: eLife. 2024 Jul 22;12:RP92075. doi: 10.7554/eLife.92075 (PMC11262792; doi:10.7554/eLife.92075)
Supplement: Supplementary file 4. — Logistic regression models for the incidence of T2D were generated using self-written scripts in MATLAB. Age, sex, BMI, and the NAFLD activity score (NAS) were used as additional cofactors. The coefficient estimate and p-value are indicated for the respective miRNA expression. ID is the respective identifier for the human microRNA on the GeneChip miRNA 4.0 Array. [file elife-92075-supp4.xlsx]

## Sheet: Tabelle1
Supplementary File 4: Associations between miRNA and T2D. Logistic regression models for the incidence of T2D were generated using self-written scripts in MATLAB. Age, sex, BMI and the NAFLD activity score (NAS) were used as additional cofactors. The coefficient estimate and p value is indicated for the respective miRNA expression. ID is the respective identifier for the human microRNA on the Gen…
NAS as cofactor					NAS is not a cofactor
ID	TranscriptID	Coefficient_estimates	pvalue		ID	TranscriptID	Coefficient_estimates	pvalue
20500149	hsa-miR-24-2-5p	-1.12606	0.0228115		20500121	hsa-let-7e-5p	-1.2408	0.0265297
20500187	hsa-miR-29b-1-5p	-1.06214	0.0340919		20500149	hsa-miR-24-2-5p	-1.08704	0.0115533
20500394	hsa-miR-197-5p	-1.693	0.0486941		20500187	hsa-miR-29b-1-5p	-0.91234	0.0288755
20500450	hsa-miR-182-5p	-0.579181	0.0449615		20500394	hsa-miR-197-5p	-1.66212	0.042097
20500490	hsa-miR-224-3p	-1.2884	0.023204		20500442	hsa-miR-34a-5p	-1.14113	0.0409848
20500777	hsa-miR-138-1-3p	-0.953987	0.0243875		20500450	hsa-miR-182-5p	-0.634095	0.0175039
20500780	hsa-miR-149-5p	-1.11878	0.0487972		20500489	hsa-miR-224-5p	-0.792661	0.0163412
20501209	hsa-miR-365a-5p	-1.51372	0.0422488		20500490	hsa-miR-224-3p	-1.43693	0.00568552
20501249	hsa-miR-381-3p	-1.88942	0.0145279		20500777	hsa-miR-138-1-3p	-0.923861	0.0242088
20501276	hsa-miR-330-3p	-1.58601	0.00946818		20501083	hsa-miR-155-5p	-1.14829	0.0293439
20503103	hsa-miR-485-5p	-1.2506	0.0352356		20501177	hsa-miR-99b-3p	-0.887656	0.039194
20504572	hsa-miR-1301-3p	-1.48219	0.0260198		20501209	hsa-miR-365a-5p	-1.38072	0.0363598
20506712	hsa-miR-1180-3p	-1.15638	0.0465834		20501249	hsa-miR-381-3p	-1.38991	0.0186222
20509071	hsa-miR-1825	1.10367	0.0320061		20501276	hsa-miR-330-3p	-1.40538	0.00745795
20511549	hsa-miR-2110	-1.05144	0.0390242		20502235	hsa-miR-18b-5p	-0.921105	0.0482446
20517680	hsa-miR-4298	-3.16744	0.00824722		20503103	hsa-miR-485-5p	-1.14943	0.0285835
20517816	hsa-miR-3609	-0.878849	0.0157642		20503789	hsa-miR-491-5p	-1.42868	0.0362257
20517824	hsa-miR-3615	-1.26525	0.017494		20503815	hsa-miR-498	-0.78136	0.0286897
20518432	hsa-miR-3911	-1.44738	0.0431244		20506712	hsa-miR-1180-3p	-1.36838	0.0219271
20518879	hsa-miR-4485	0.975733	0.0377391		20506779	hsa-miR-1231	-1.14315	0.0494556
20518881	hsa-miR-4487	1.13959	0.0475367		20509071	hsa-miR-1825	1.08217	0.0193815
20518935	hsa-miR-4534	-3.13144	0.0147528		20515610	hsa-miR-3180-3p	-1.64982	0.0334536
20519425	hsa-miR-4646-5p	1.18451	0.0105675		20517680	hsa-miR-4298	-2.89633	0.00962872
20519467	hsa-miR-4669	-1.50636	0.0344255		20517710	hsa-miR-4253	-0.785381	0.0290278
20519518	hsa-miR-4701-3p	-1.95834	0.024101		20517816	hsa-miR-3609	-0.835285	0.0121502
20526885	hsa-miR-7162-3p	-0.650145	0.0491729		20517824	hsa-miR-3615	-1.25721	0.0114024
20529139	hsa-miR-7847-3p	-2.91832	0.0150798		20517835	hsa-miR-3621	-1.70766	0.0466449
20529781	hsa-miR-8071	-1.099	0.0322402		20518432	hsa-miR-3911	-1.42223	0.0263159
					20518879	hsa-miR-4485	1.06449	0.0179584
					20518935	hsa-miR-4534	-2.97843	0.0146248
					20519425	hsa-miR-4646-5p	1.04396	0.0134679
					20519467	hsa-miR-4669	-1.24826	0.0461498
					20519518	hsa-miR-4701-3p	-1.72515	0.0248808
					20520208	hsa-miR-5006-5p	-1.06071	0.0468679
					20525659	hsa-miR-6849-5p	-1.09034	0.0392031
					20525739	hsa-miR-6889-5p	-0.909322	0.0430906
					20526885	hsa-miR-7162-3p	-0.693228	0.0276722
					20529139	hsa-miR-7847-3p	-2.54162	0.0169645
					20529781	hsa-miR-8071	-1.03164	0.0271992
