# Supplementary material for: Liver microRNA transcriptome reveals miR-182 as link between type 2 diabetes and fatty liver disease in obesity
Source: eLife. 2024 Jul 22;12:RP92075. doi: 10.7554/eLife.92075 (PMC11262792; doi:10.7554/eLife.92075)
Supplement: Supplementary file 5. — Effect sizes describe the change of the trait if the miRNA expression changes by 1 log2 value. Age, sex, BMI, and the NAFLD activity score (NAS) were used as additional cofactors whenever they did not serve as response value. ID is the respective identifier for the human microRNA on the GeneChip miRNA 4.0 Array. [file elife-92075-supp5.xlsx]

## Sheet: Tabelle1
Supplementary File 5: Associations between miRNAs and metabolic traits. Effect sizes describe the change of the trait if the miRNA expression changes by 1 log2 value. Age, sex, BMI and the NAFLD activity score (NAS) were used as additional cofactors whenever they did not serve as response value. ID is the respective identifier for the human microRNA on the GeneChipTM miRNA 4.0 Array.
Fasting glucose					HbA1c					Serum insulin					Serum triglycerides					NAS
ID	TranscriptID	Effect size (mg/dl)	pvalue		ID	TranscriptID	Effect size (%)	pvalue		ID	TranscriptID	Effect size (pmol/l)	pvalue		ID	TranscriptID	Effect size (mg/dl)	pvalue		ID	TranscriptID	Effect size (score)	pvalue
20500181	hsa-miR-99a-5p	-63.6628	0.0333003		20500149	hsa-miR-24-2-5p	0.660377	0.027924		20500115	hsa-let-7b-5p	-114.711	0.0319743		20500142	hsa-miR-21-3p	50.0843	0.0486782		20500164	hsa-miR-31-5p	0.297418	0.032643
20500188	hsa-miR-29b-3p	24.9982	0.0218791		20500150	hsa-miR-25-5p	0.760973	0.0135427		20500164	hsa-miR-31-5p	-19.4617	0.047548		20500159	hsa-miR-28-3p	-102.723	0.0422017		20500400	hsa-miR-199a-3p	0.151547	0.0116789
20500450	hsa-miR-182-5p	15.0593	0.0233304		20500181	hsa-miR-99a-5p	-2.07333	0.0495587		20500173	hsa-miR-93-5p	-84.7321	0.0177801		20500164	hsa-miR-31-5p	35.3753	0.0054054		20500433	hsa-miR-139-3p	-0.137997	0.0393452
20500469	hsa-miR-212-3p	21.9601	0.029517		20500188	hsa-miR-29b-3p	0.611183	0.0356238		20500489	hsa-miR-224-5p	29.9345	0.0180121		20500395	hsa-miR-197-3p	-71.0626	0.0054828		20500442	hsa-miR-34a-5p	0.127213	0.0270248
20500555	hsa-miR-200b-5p	23.2296	0.0156992		20500394	hsa-miR-197-5p	1.37172	0.0170153		20500745	hsa-miR-140-5p	26.4891	0.0485933		20500448	hsa-miR-181c-5p	64.4258	0.0391396		20500450	hsa-miR-182-5p	0.281202	0.0395469
20500726	hsa-miR-122-5p	-308.801	0.0383629		20500450	hsa-miR-182-5p	0.472059	0.0460679		20500746	hsa-miR-140-3p	-93.359	0.00709805		20500461	hsa-miR-204-3p	62.0228	0.00669626		20500458	hsa-miR-199b-3p	0.151547	0.0116789
20500777	hsa-miR-138-1-3p	27.0373	0.00391939		20500490	hsa-miR-224-3p	0.806526	0.0159303		20500787	hsa-miR-185-5p	-79.229	0.0251669		20500724	hsa-miR-30b-5p	-49.7752	0.0436168		20500489	hsa-miR-224-5p	0.454668	2.75083e-06
20501249	hsa-miR-381-3p	30.9929	0.0439715		20500726	hsa-miR-122-5p	-10.0538	0.00472102		20500848	hsa-miR-320a	-71.2749	0.00956737		20500741	hsa-miR-135a-3p	62.6808	0.00446626		20500490	hsa-miR-224-3p	0.259412	0.00032908
20501276	hsa-miR-330-3p	23.9638	0.0188662		20500777	hsa-miR-138-1-3p	0.748802	0.0101476		20501243	hsa-miR-378a-3p	-66.7268	0.0382696		20500780	hsa-miR-149-5p	-53.8822	0.0424714		20500556	hsa-miR-200b-3p	0.307113	0.00839456
20503103	hsa-miR-485-5p	30.1896	0.0334862		20501177	hsa-miR-99b-3p	0.89155	0.00428029		20501291	hsa-miR-148b-3p	28.72	0.0227703		20500781	hsa-miR-149-3p	100.967	0.0153507		20500715	hsa-let-7i-5p	0.0897325	0.0470841
20503815	hsa-miR-498	21.8484	0.0233438		20501249	hsa-miR-381-3p	1.20045	0.000898725		20502235	hsa-miR-18b-5p	44.5717	0.0206499		20503803	hsa-miR-494-3p	-112.72	0.0442979		20500746	hsa-miR-140-3p	-0.0761986	0.0377642
20504379	hsa-miR-629-5p	25.478	0.0234567		20501276	hsa-miR-330-3p	0.92446	0.000390055		20502451	hsa-miR-452-5p	36.7369	0.0154262		20503887	hsa-miR-505-3p	-46.8039	0.00809579		20500796	hsa-miR-193a-3p	0.155324	0.0399858
20506839	hsa-miR-1247-3p	17.6153	0.0197071		20503103	hsa-miR-485-5p	1.34685	0.0227866		20503105	hsa-miR-486-5p	-33.8409	0.011823		20503908	hsa-miR-532-3p	-63.9315	0.0493159		20501083	hsa-miR-155-5p	0.153959	0.0209109
20515603	hsa-miR-3175	-32.7044	0.0274893		20503789	hsa-miR-491-5p	1.11452	0.0098573		20504295	hsa-miR-572	47.1106	0.00654525		20504273	hsa-miR-92b-5p	102.423	0.00466448		20501163	hsa-miR-200a-3p	0.315031	0.00544939
20515610	hsa-miR-3180-3p	45.605	0.0156447		20504379	hsa-miR-629-5p	0.818528	0.0311345		20504421	hsa-miR-654-3p	33.7024	0.0338244		20504298	hsa-miR-574-3p	-60.2496	0.0438155		20501224	hsa-miR-376c-3p	0.19954	0.0153768
20517680	hsa-miR-4298	51.1898	0.0444962		20504569	hsa-miR-1271-5p	0.975571	0.0204657		20504562	hsa-miR-320b	-70.2959	0.0123537		20504324	hsa-miR-550a-5p	65.2046	0.0156667		20501242	hsa-miR-378a-5p	-0.105824	0.0235599
20517726	hsa-miR-4269	23.439	0.0330905		20504572	hsa-miR-1301-3p	0.972797	0.00641999		20504563	hsa-miR-320c	-75.1712	0.0124384		20504396	hsa-miR-642a-3p	39.3451	0.000964402		20501243	hsa-miR-378a-3p	-0.107783	0.00861621
20517820	hsa-miR-3613-5p	-7.18349	0.031272		20505791	hsa-miR-877-5p	1.80407	0.0432984		20505790	hsa-miR-885-3p	79.823	0.0258005		20504413	hsa-miR-663a	84.3557	0.0378762		20501291	hsa-miR-148b-3p	0.213699	0.0464779
20518880	hsa-miR-4486	45.5358	0.0339366		20506712	hsa-miR-1180-3p	0.777301	0.00541548		20506872	hsa-miR-1275	-74.1818	0.0156031		20504559	hsa-miR-1224-5p	51.0305	0.0133812		20502451	hsa-miR-452-5p	0.353791	2.68236e-05
20519494	hsa-miR-1343-5p	44.1451	0.0480731		20517680	hsa-miR-4298	1.94265	0.0168382		20509070	hsa-miR-320d	-61.9186	0.0406623		20505789	hsa-miR-885-5p	-77.4752	0.0347254		20503100	hsa-miR-483-5p	-0.127387	0.0172393
20519507	hsa-miR-4695-5p	49.5644	0.0234163		20517816	hsa-miR-3609	0.557379	0.0131346		20509228	hsa-miR-1910-5p	44.3657	0.0158373		20506009	hsa-miR-939-5p	71.0955	0.0133274		20503793	hsa-miR-146b-5p	0.144252	0.0242275
20519607	hsa-miR-4749-5p	42.9045	0.0329674		20519467	hsa-miR-4669	1.11934	0.0320767		20509237	hsa-miR-1915-3p	79.38	0.0181387		20506801	hsa-miR-1207-5p	95.3925	0.0026669		20503811	hsa-miR-181d-5p	0.129702	0.0391071
20521811	hsa-miR-664b-3p	-37.5754	0.00157054		20521811	hsa-miR-664b-3p	-0.754148	0.0230178		20511558	hsa-miR-2115-5p	-59.3354	0.0235906		20507742	hsa-miR-1469	124.651	0.0306403		20504273	hsa-miR-92b-5p	0.119938	0.0127754
20521825	hsa-miR-5585-3p	21.6653	0.0426555		20525659	hsa-miR-6849-5p	0.901536	0.012921		20515603	hsa-miR-3175	-52.9382	0.0247474		20515623	hsa-miR-3187-3p	46.7896	0.0303583		20504396	hsa-miR-642a-3p	0.388062	0.00628422
20525023	hsa-miR-6511a-5p	25.814	0.0277255		20529139	hsa-miR-7847-3p	1.87641			20515617	hsa-miR-3185	80.6644	0.00482531		20517710	hsa-miR-4253	49.1927	0.00250612		20506882	hsa-miR-1281	-0.108515	0.0404831
20525523	hsa-miR-6781-5p	24.6135	0.0480945							20517690	hsa-miR-4310	57.8603	0.0107995		20517745	hsa-miR-4286	-28.2678	0.0241786		20515610	hsa-miR-3180-3p	0.135947	0.00338918
20525539	hsa-miR-6789-5p	50.0832	0.030846							20517730	hsa-miR-4271	28.5607	0.0471921		20517907	hsa-miR-3656	96.6485	0.0392785		20517675	hsa-miR-378c	-0.0842187	0.0479962
20525659	hsa-miR-6849-5p	32.8664	0.0187848							20517835	hsa-miR-3621	68.1168	0.0387131		20518721	hsa-miR-642b-3p	40.0114	0.00299871		20517710	hsa-miR-4253	0.268916	0.0113427
20525739	hsa-miR-6889-5p	21.8282	0.0479454							20517899	hsa-miR-3648	35.4077	0.0439624		20518782	hsa-miR-1268b	100.018	0.0147945		20518425	hsa-miR-3180	0.118309	0.0203599
20526885	hsa-miR-7162-3p	17.1888	0.042952							20517919	hsa-miR-3665	109.678	0.00782359		20518800	hsa-miR-4428	66.255	0.00647792		20518446	hsa-miR-3921	-0.155648	0.0341761
20529781	hsa-miR-8071	29.377	0.0265044							20518801	hsa-miR-4429	-77.3414	0.0319667		20518802	hsa-miR-4430	77.0331	0.0352248		20518802	hsa-miR-4430	0.106583	0.0309841
										20518834	hsa-miR-4454	-38.489	0.0147287		20518807	hsa-miR-4433-3p	102.185	0.00860114		20518818	hsa-miR-4443	0.145096	0.0118879
										20518843	hsa-miR-3135b	39.7728	0.0312321		20518818	hsa-miR-4443	79.851	0.00894567		20518874	hsa-miR-4481	0.199445	0.00491202
										20518852	hsa-miR-4467	46.7724	0.0169314		20518826	hsa-miR-4449	69.4997	0.0219871		20518936	hsa-miR-378i	-0.0840678	0.0324355
										20518910	hsa-miR-4513	31.6999	0.0476149		20518839	hsa-miR-4459	123.027	0.0196477		20519439	hsa-miR-4655-5p	0.164609	0.0444508
										20518933	hsa-miR-4532	51.5236	0.0389452		20518845	hsa-miR-4463	104.98	0.0238506		20519498	hsa-miR-4690-5p	0.103506	0.0171747
										20519048	hsa-miR-3960	98.0099	0.0158992		20518878	hsa-miR-4484	35.3111	0.0296754		20519524	hsa-miR-4706	0.138102	0.0178876
										20519463	hsa-miR-4668-5p	-34.5934	0.0490228		20518881	hsa-miR-4487	63.9904	0.0197624		20519533	hsa-miR-4710	0.145992	0.00292188
										20519474	hsa-miR-4674	68.4554	0.0351662		20518892	hsa-miR-4497	175.464	0.00105803		20519554	hsa-miR-4721	0.200793	0.0219112
										20519507	hsa-miR-4695-5p	70.8973	0.0262261		20518935	hsa-miR-4534	100.067	0.0237637		20519609	hsa-miR-4750-5p	0.122254	0.0075841
										20519580	hsa-miR-4734	68.0224	0.0488992		20519457	hsa-miR-4665-5p	87.193	0.00986479		20521825	hsa-miR-5585-3p	0.177104	0.0382307
										20519589	hsa-miR-4739	61.3765	0.0453221		20519497	hsa-miR-4689	81.7701	0.0271815		20523018	hsa-miR-6086	0.133293	0.0461745
										20519615	hsa-miR-371b-5p	21.3076	0.0288355		20519524	hsa-miR-4706	68.6885	0.0253045		20525386	hsa-miR-6511b-5p	0.146224	0.0346745
										20519679	hsa-miR-4787-5p	119.293	0.00532333		20519554	hsa-miR-4721	42.6604	0.0382923		20525453	hsa-miR-6746-5p	0.177558	0.0406788
										20519702	hsa-miR-4800-3p	28.834	0.0364043		20519600	hsa-miR-4745-5p	97.187	0.0231352		20525513	hsa-miR-6776-5p	0.146935	0.0246324
										20520198	hsa-miR-5001-5p	53.3577	0.0106614		20519626	hsa-miR-4758-5p	135.558	0.00111517		20525519	hsa-miR-6779-5p	0.101176	0.00813078
										20521825	hsa-miR-5585-3p	38.0907	0.0123428		20520218	hsa-miR-5010-5p	65.1239	0.00929942		20525525	hsa-miR-6782-5p	0.136875	0.0312569
										20523000	hsa-miR-6068	49.7477	0.00749844		20520577	hsa-miR-5196-5p	58.2136	0.0220347		20525587	hsa-miR-6813-5p	0.290601	0.010268
										20523007	hsa-miR-6075	50.9349	0.000884227		20521786	hsa-miR-5572	55.0151	0.0132016		20525653	hsa-miR-6846-5p	0.141312	0.0280904
										20524035	hsa-miR-6125	79.6339	0.0212661		20521811	hsa-miR-664b-3p	-49.5312	0.0450987		20525657	hsa-miR-6848-5p	0.116075	0.0163035
										20525017	hsa-miR-6508-5p	41.307	0.0175202		20521837	hsa-miR-5589-3p	-45.0712	0.0423704		20525684	hsa-miR-6861-5p	0.167383	0.0273753
										20525499	hsa-miR-6769a-5p	73.6996	0.00457162		20522537	hsa-miR-5787	111.306	0.0168262		20525735	hsa-miR-6887-5p	0.152226	0.030194
										20525509	hsa-miR-6774-5p	31.3226	0.0380932		20523018	hsa-miR-6086	55.2866	0.0433946
										20525539	hsa-miR-6789-5p	71.9181	0.0293751		20524036	hsa-miR-6126	61.9352	0.00585408
										20525659	hsa-miR-6849-5p	62.3897	0.00222235		20525383	hsa-miR-6716-5p	109.912	0.000283543
										20525699	hsa-miR-6869-5p	82.0596	0.0267813		20525444	hsa-miR-6741-5p	66.0085	0.0318247
										20526178	hsa-miR-7110-5p	-65.3042	0.0318021		20525465	hsa-miR-6752-5p	92.8156	0.0141595
										20526885	hsa-miR-7162-3p	30.868	0.0181154		20525469	hsa-miR-6754-5p	30.295	0.0315119
										20528733	hsa-miR-7704	91.684	0.0376099		20525487	hsa-miR-6763-5p	98.2839	0.00803859
										20529566	hsa-miR-7975	-24.219	0.031434		20525491	hsa-miR-6765-5p	125.856	0.00868615
										20529568	hsa-miR-7977	-32.8124	0.0471134		20525497	hsa-miR-6768-5p	44.1591	0.0282417
										20529774	hsa-miR-8064	29.8649	0.0418896		20525513	hsa-miR-6776-5p	67.2095	0.0136579
										20529783	hsa-miR-8073	26.0284	0.0482356		20525525	hsa-miR-6782-5p	87.3483	0.00136825
										20529785	hsa-miR-8075	-73.6911	0.0117931		20525533	hsa-miR-6786-5p	130.612	0.0157769
															20525535	hsa-miR-6787-5p	75.3104	0.0464252
															20525541	hsa-miR-6790-5p	82.8201	0.0183736
															20525549	hsa-miR-6794-5p	97.3855	0.0117046
															20525557	hsa-miR-6798-5p	88.781	0.00763022
															20525565	hsa-miR-6802-5p	97.469	0.0178135
															20525567	hsa-miR-6803-5p	102.94	0.0251537
															20525577	hsa-miR-6808-5p	112.122	0.0167276
															20525609	hsa-miR-6824-5p	62.9298	0.0322147
															20525611	hsa-miR-6825-5p	62.994	0.0250129
															20525613	hsa-miR-6826-5p	73.4804	0.00372537
															20525633	hsa-miR-6780b-5p	42.9966	0.00107491
															20525644	hsa-miR-6840-3p	39.7238	0.025044
															20525683	hsa-miR-6860	62.183	0.0365236
															20525701	hsa-miR-6870-5p	82.2041	0.0341289
															20525703	hsa-miR-6871-5p	57.6894	0.024121
															20525719	hsa-miR-6879-5p	98.9864	0.015095
															20525743	hsa-miR-6891-5p	81.1301	0.0374277
															20526170	hsa-miR-7106-5p	63.2887	0.0381292
															20526172	hsa-miR-7107-5p	117.162	0.0131619
															20529131	hsa-miR-4433b-3p	97.2729	0.0146591
															20529143	hsa-miR-7851-3p	29.1685	0.0467373
