# Supplementary material for: Liver microRNA transcriptome reveals miR-182 as link between type 2 diabetes and fatty liver disease in obesity
Source: eLife. 2024 Jul 22;12:RP92075. doi: 10.7554/eLife.92075 (PMC11262792; doi:10.7554/eLife.92075)
Supplement: Supplementary file 6. — To control for associations with both confounding factors, also the HbA1c level was considered as cofactor for linear regression models. Effect sizes describe the change of the trait if the miRNA expression changes by 1 log2 value. ID is the respective identifier for the human microRNA on the GeneChip miRNA 4.0 Array. [file elife-92075-supp6.xlsx]

## Sheet: Tabelle1
Supplementary File 6: Associations between miRNAs and excluding factors age, BMI and sex. To control for associations with both confounding factors, also the HbA1c level was considered as cofactor for linear regression models. Effect sizes describe the change of the trait if the miRNA expression changes by 1 log2 value. ID is the respective identifier for the human microRNA on the GeneChipTM miRN…
Age					BMI					Sex
ID	TranscriptID	Effect size (years)	pvalue		ID	TranscriptID	Effect size (kg/m^2)	pvalue		ID	TranscriptID	Coefficient estimate	pvalue
20500112	hsa-let-7a-5p	-4.41993	0.0428535		20500144	hsa-miR-22-3p	-7.09886	0.0287159		20500489	hsa-miR-224-5p	-0.985219	0.0230548
20500119	hsa-let-7d-5p	-5.83942	0.0474454		20500158	hsa-miR-28-5p	-7.79902	0.0478072		20500490	hsa-miR-224-3p	-1.27134	0.0238646
20500121	hsa-let-7e-5p	-4.39556	0.0292362		20500163	hsa-miR-30a-3p	-4.66815	0.0468278		20500762	hsa-miR-191-3p	1.22016	0.0407243
20500123	hsa-let-7f-5p	-3.22428	0.0477971		20500164	hsa-miR-31-5p	-1.99056	0.0491994		20500798	hsa-miR-195-5p	-1.6084	0.0433274
20500154	hsa-miR-26b-5p	-2.37277	0.0378926		20500181	hsa-miR-99a-5p	-11.3603	0.0125752		20502451	hsa-miR-452-5p	-1.51042	0.0187704
20500422	hsa-miR-30c-5p	-4.79623	0.0471104		20500183	hsa-miR-100-5p	-8.39912	0.0135907		20503809	hsa-miR-497-5p	-2.3338	0.0384202
20500432	hsa-miR-139-5p	-4.69846	0.0127067		20500386	hsa-miR-192-3p	-5.66031	0.0291849		20504289	hsa-miR-551b-5p	-1.52262	0.0168551
20500489	hsa-miR-224-5p	-3.12477	0.0442133		20500424	hsa-miR-30d-5p	-8.30494	0.0393346		20505760	hsa-miR-708-5p	-0.680802	0.0437567
20500721	hsa-miR-23b-3p	-6.11513	0.0399852		20500471	hsa-miR-214-5p	-4.5237	0.0235064		20506712	hsa-miR-1180-3p	-1.13414	0.0467358
20500724	hsa-miR-30b-5p	-3.39952	0.037728		20500722	hsa-miR-27b-5p	-4.96572	0.031749		20506830	hsa-miR-1304-3p	1.24412	0.0194359
20500769	hsa-miR-126-3p	-6.45012	0.0204964		20500781	hsa-miR-149-3p	6.68375	0.0269111		20518785	hsa-miR-4417	0.847513	0.034746
20500797	hsa-miR-194-5p	-5.99299	0.0300561		20501179	hsa-miR-296-3p	7.25737	0.00214253		20518933	hsa-miR-4532	1.43753	0.0372847
20501183	hsa-miR-30e-3p	-2.73426	0.0209474		20501242	hsa-miR-378a-5p	-6.85518	0.019944		20525017	hsa-miR-6508-5p	0.986543	0.0369645
20501224	hsa-miR-376c-3p	-3.5245	0.0229244		20501244	hsa-miR-379-5p	-7.09548	0.0169212
20501244	hsa-miR-379-5p	-6.34726	0.0217551		20501249	hsa-miR-381-3p	-4.99222	0.0464956
20501281	hsa-miR-337-5p	-3.49357	0.0135715		20501277	hsa-miR-328-5p	9.19441	0.0067222
20502235	hsa-miR-18b-5p	-3.39932	0.0350002		20501293	hsa-miR-331-3p	-3.62522	0.0256889
20503102	hsa-miR-484	-4.75302	0.00626229		20502122	hsa-miR-422a	-5.90459	0.0351729
20503103	hsa-miR-485-5p	-4.63444	0.04367		20502126	hsa-miR-424-3p	-6.01599	0.0234351
20503800	hsa-miR-432-5p	-5.89444	0.0198752		20503803	hsa-miR-494-3p	-8.26961	0.0481028
20503877	hsa-miR-501-5p	-3.81725	0.035866		20503815	hsa-miR-498	3.01659	0.0481449
20504218	hsa-miR-487b-3p	-4.13013	0.0150004		20504218	hsa-miR-487b-3p	-3.93736	0.0393751
20504379	hsa-miR-629-5p	-3.67483	0.0260715		20504273	hsa-miR-92b-5p	6.45727	0.0283352
20504421	hsa-miR-654-3p	-2.97474	0.0296425		20504391	hsa-miR-638	7.54035	0.0414806
20506776	hsa-miR-1229-5p	5.21453	0.0282968		20504559	hsa-miR-1224-5p	3.25933	0.0418891
20515585	hsa-miR-3162-5p	6.3598	0.017618		20504586	hsa-miR-762	8.1822	0.0439578
20517680	hsa-miR-4298	-8.05402	0.0318921		20506763	hsa-miR-1225-5p	4.73621	0.0335676
20517816	hsa-miR-3609	-2.73118	0.0204062		20506774	hsa-miR-1228-5p	7.43177	0.034277
20517948	hsa-miR-3687	2.02547	0.049914		20506801	hsa-miR-1207-5p	4.77042	0.0454408
20518818	hsa-miR-4443	-4.53776	0.0479439		20515550	hsa-miR-3141	7.4682	0.0210915
20518879	hsa-miR-4485	3.07541	0.0287027		20515618	hsa-miR-3065-5p	-4.51887	0.032279
20518892	hsa-miR-4497	-8.02713	0.033976		20517690	hsa-miR-4310	5.10611	0.0122397
20519493	hsa-miR-4687-3p	5.91668	0.0358853		20517717	hsa-miR-4327	3.34219	0.0421069
20519636	hsa-miR-4763-3p	5.87886	0.046013		20517729	hsa-miR-4270	6.86051	0.0289646
20520349	hsa-miR-1273f	2.48776	0.0456487		20517736	hsa-miR-4281	9.09543	0.00250261
20525603	hsa-miR-6821-5p	6.26736	0.0484454		20517907	hsa-miR-3656	7.18957	0.0336131
20525699	hsa-miR-6869-5p	7.2659	0.0389289		20518783	hsa-miR-378e	-3.2039	0.0388393
20529132	hsa-miR-1273h-5p	2.6569	0.0194554		20518788	hsa-miR-378f	-6.40906	0.040897
					20518794	hsa-miR-378g	-5.84117	0.025751
					20518800	hsa-miR-4428	3.8325	0.0463951
					20518839	hsa-miR-4459	8.81311	0.0214427
					20518851	hsa-miR-4466	8.71202	0.0450324
					20518903	hsa-miR-2392	6.55557	0.0249802
					20518931	hsa-miR-4530	5.62208	0.035824
					20518936	hsa-miR-378i	-8.46462	0.0143475
					20518940	hsa-miR-1587	5.08499	0.0215202
					20519429	hsa-miR-4649-5p	5.58807	0.03491
					20519493	hsa-miR-4687-3p	6.09119	0.0490008
					20519494	hsa-miR-1343-5p	7.74255	0.0193076
					20519525	hsa-miR-4707-5p	7.73057	0.0319401
					20519607	hsa-miR-4749-5p	6.74022	0.030154
					20519626	hsa-miR-4758-5p	6.49079	0.0457551
					20520569	hsa-miR-5189-3p	-4.50834	0.0105334
					20521811	hsa-miR-664b-3p	-3.92739	0.0421649
					20521825	hsa-miR-5585-3p	3.71194	0.0237344
					20522537	hsa-miR-5787	7.96961	0.0190597
					20523017	hsa-miR-6085	8.33449	0.0192028
					20523019	hsa-miR-6087	15.7907	0.00674514
					20523020	hsa-miR-6088	9.37062	0.0147618
					20524034	hsa-miR-6124	4.97632	0.0438106
					20524054	hsa-miR-6133	5.51131	0.0334269
					20525392	hsa-miR-6721-5p	2.75855	0.0341576
					20525394	hsa-miR-6722-3p	6.50501	0.0352332
					20525396	hsa-miR-6724-5p	5.77766	0.0435206
					20525420	hsa-miR-6729-5p	8.49743	0.0389401
					20525448	hsa-miR-6743-5p	5.42924	0.0394956
					20525459	hsa-miR-6749-5p	8.13287	0.0141998
					20525511	hsa-miR-6775-5p	13.5757	0.0016103
					20525519	hsa-miR-6779-5p	8.92792	0.0136148
					20525531	hsa-miR-6785-5p	5.66514	0.0140582
					20525533	hsa-miR-6786-5p	8.42693	0.0347357
					20525565	hsa-miR-6802-5p	6.64521	0.027119
					20525577	hsa-miR-6808-5p	8.74942	0.00704848
					20525578	hsa-miR-6808-3p	-5.09132	0.0217628
					20525585	hsa-miR-6812-5p	11.6798	0.0158506
					20525657	hsa-miR-6848-5p	6.24309	0.0317127
					20525681	hsa-miR-6769b-5p	10.1437	0.00897609
					20525684	hsa-miR-6861-5p	4.39523	0.0131382
					20525743	hsa-miR-6891-5p	7.12602	0.00700704
					20526172	hsa-miR-7107-5p	8.10354	0.0186431
					20526861	hsa-miR-7150	4.85839	0.02784
					20529131	hsa-miR-4433b-3p	7.14655	0.0120109
					20529137	hsa-miR-7845-5p	7.74467	0.001808
					20529799	hsa-miR-8089	5.13444	0.0251275
