# Supplementary material for: Liver microRNA transcriptome reveals miR-182 as link between type 2 diabetes and fatty liver disease in obesity
Source: eLife. 2024 Jul 22;12:RP92075. doi: 10.7554/eLife.92075 (PMC11262792; doi:10.7554/eLife.92075)
Supplement: Supplementary file 7. [file elife-92075-supp7.xlsx]

## Sheet: Tabelle1
Supplementary File 7: Predicted target genes from miRTarBase used for pathway analysis.
pathway_list	hsa-miR-138-1-3p	hsa-miR-149-5p	hsa-miR-182-5p	hsa-miR-224-3p	hsa-miR-24-2-5p	hsa-miR-330-3p	hsa-miR-381-3p	hsa-miR-485-5p
HIF-1 signaling pathway	PDK1;HIF1A	IL6	CDKN1A;BCL2;CDKN1B		BCL2	VEGFA
Thyroid hormone signaling pathway	HIF1A		FOXO1;GSK3B
AGE-RAGE signaling pathway in diabetic complications		IL6	FOXO1;BCL2;SMAD4;CDKN1B		BCL2	VEGFA;CDC42
Apoptosis		BBC3;FASLG	BCL2		BCL2		NFKBIA
cAMP signaling pathway		PTGER2	ADCY6;CREB1;BDNF;CREB5;PLD1;TIAM1				NFKBIA
Cellular senescence		FOXM1;IL6	CDKN1A;FOXO3;FOXO1;CCND2;PTEN;CHEK2			E2F1
Cytokine-cytokine receptor interaction		IL6;FASLG
Cytosolic DNA-sensing pathway		IL6					NFKBIA
EGFR tyrosine kinase inhibitor resistance		IL6	FOXO3;BCL2;PTEN;GSK3B		BCL2	VEGFA
Endocrine resistance		SP1	CDKN1A;ADCY6;BCL2;CDKN1B		BCL2	E2F1;SP1
Estrogen signaling pathway		SP1	ADCY6;CREB1;BCL2;CREB5		BCL2	SP1
FoxO signaling pathway		IL6;FASLG	CDKN1A;FOXO3;FOXO1;CCND2;SMAD4;PTEN;CDKN1B
Hippo signaling pathway		BBC3	CCND2;SNAI2;SMAD4;GSK3B				ID1	FZD7
Insulin resistance		IL6	FOXO1;CREB1;PTEN;GSK3B;CREB5				NFKBIA	PPARGC1A
JAK-STAT signaling pathway		IL6	CDKN1A;BCL2;CCND2		BCL2
MAPK signaling pathway		FGFR1;MYD88;FGF21;FASLG	FGF9;BDNF			VEGFA;CDC42
Neurotrophin signaling pathway		FASLG	FOXO3;BCL2;GSK3B;BDNF		BCL2	NTRK3;CDC42	NFKBIA
NF-kappa B signaling pathway		MYD88	CYLD;BCL2		BCL2		NFKBIA
Non-alcoholic fatty liver disease		IL6;FASLG	GSK3B;UQCRFS1			CDC42
p53 signaling pathway		BBC3	CDKN1A;BCL2;CCND2;PTEN;CHEK2;THBS1		BCL2
Parathyroid hormone synthesis, secretion and action		SP1;FGFR1	CDKN1A;ADCY6;CREB1;BCL2;CREB5;PLD1		BCL2	SP1
PI3K-Akt signaling pathway		FGFR1;IL6;FGF21;FASLG	CDKN1A;FOXO3;CREB1;FGF9;BCL2;CCND2;PTEN;GSK3B;BDNF;CREB5;CDKN1B;THBS1		BCL2	VEGFA
Ras signaling pathway		FGFR1;FGF21;FASLG	FGF9;BDNF;PLD1;TIAM1			VEGFA;CDC42
TGF-beta signaling pathway		SP1	SMAD4;THBS1			SP1	ID1
TNF signaling pathway		IL6	CREB1;CREB5				NFKBIA
AMPK signaling pathway			FOXO3;FOXO1;CREB1;CREB5					PPARGC1A
Apelin signaling pathway			ADCY6;SMAD4				HDAC4	PPARGC1A
Cell cycle			CDKN1A;CCND2;SMAD4;GSK3B;CHEK2;CDKN1B			E2F1	WEE1
cGMP-PKG signaling pathway			ADCY6;CREB1;CREB5
Circadian rhythm			CLOCK;CREB1
Endocrine and other factor-regulated calcium reabsorption			ADCY6
ErbB signaling pathway			CDKN1A;GSK3B;CDKN1B
Ether lipid metabolism			PLD1
Gastric acid secretion			ADCY6
Glucagon signaling pathway			FOXO1;CREB1;CREB5					PPARGC1A
Glutamatergic synapse			ADCY6;PLD1
Glycerophospholipid metabolism			PLD1
Growth hormone synthesis, secretion and action			ADCY6;CREB1;GSK3B;CREB5
Hedgehog signaling pathway			BCL2;CCND2;GSK3B		BCL2
Inositol phosphate metabolism			PTEN
Insulin secretion			ADCY6;CREB1;CREB5
Insulin signaling pathway			FOXO1;FLOT1;GSK3B					FLOT1;PPARGC1A
Longevity regulating pathway			FOXO3;FOXO1;ADCY6;CREB1;CREB5	ATG5;RB1CC1				PPARGC1A
mTOR signaling pathway			PTEN;GSK3B					FZD7
Phosphatidylinositol signaling system			PTEN
Phospholipase D signaling pathway			ADCY6;PLD1
Sphingolipid signaling pathway			BCL2;PTEN;PLD1		BCL2
Thyroid cancer			CDKN1A
Thyroid hormone synthesis			ADCY6;CREB1;CREB5
Wnt signaling pathway			CCND2;SMAD4;GSK3B					FZD7
Glycosphingolipid biosynthesis - lacto and neolacto series				FUT4
Mannose type O-glycan biosynthesis				FUT4
mRNA surveillance pathway						MSI1
Adipocytokine signaling pathway							NFKBIA	PPARGC1A
