# Supplementary material for: Liver microRNA transcriptome reveals miR-182 as link between type 2 diabetes and fatty liver disease in obesity
Source: eLife. 2024 Jul 22;12:RP92075. doi: 10.7554/eLife.92075 (PMC11262792; doi:10.7554/eLife.92075)
Supplement: Supplementary file 8. — Additional column qPCR contains target genes which were considered for analysis by qPCR in the complete cohort. [file elife-92075-supp8.xlsx]

## Sheet: Tabelle1
Supplementary File 8: Candidate genes for hsa-mR-182-5p from database entries stratified by metabolic pathways from Gene Ontology. Additional column qPCR contains target genes which were considered for analysis by qPCR in the complete cohort.
Name	GO Term	Gene list	qPCR
Insulin receptor signaling pathway	GO:0008286	AP3S1, APC, APPL1, EIF4EBP2, FOXO1, GRB2, GSK3B, IGF1R, IGF1R, INSR, IRS1, IRS4, PDK4, PHIP, PIK3C2A, PIK3R1, PTPN1, SLC2A8, SOGA1	FOXO1, INSR, IRS1
Gluconeogenesis	GO:0006094	ATF3, ATF4, CERS2, CRTC2, G6PC1, GPI, PC, SLC37A4	G6PC1 (G6PC)
Lipid biosynthetic process	GO:0008610	ACLY, ACSL4, FDFT1, PRKAA1, PRKAA2, SC5D, SCD	SCD
Sterol biosynthetic process	GO:0016126	DHCR7, FDFT1, HMGCS1, INSIG1, LBR, PRKAA1, PRKAA2, SC5D	DHCR7, HMGCS1, INSIG1
Lipid metabolism	GO:0006629	ABCA2, ABHD12, ACAA2, ACACA, ACER3, ACLY, ACSL4, ADIPOR1, AGPAT2, ALDH1A3, ALDH1A3, ALDH3A2, B3GALT1, B4GALT3, B4GALT5, BCAT2, BCKDHB, BRCA1, CBR4, CDIPT, CERS2, CERS5, CERS6, CHST10, CROT, DDHD1, DDHD2, DGKH, DHCR7, ELOVL6, ETNK2, FAR1, FASN, FDFT1, G6PD, HMGCLL1, HMGCS1, INSIG1, JAZF1, LBR, LIPT1, LPCAT3, LRP10, LRP8, MBLAC2, MGST2, NAA40, NEU3, OCRL, OSBPL10, PAFAH1B1, PAFAH1B1, PAFAH1B2, PC, …	ACACA, SCD, PNPLA2, FASN, ELOVL6, DHCR7, HMGCS1, INSIG1
Glycogen synthesis	GO:0005978	--	--
Glycogen breakdown	GO:0005980	G6PC1	G6PC1 (G6PC)
Insulin response	GO:0032868	CAT, EIF6, GALP, IGF1R, IGF1R, IRS1, KLF15, SESN3, SIRT1, SORT1, SRSF4, SRSF6, TSC1, OTC, SESN2	IRS1
Lipolysis	GO:0016042	CRTC3, DDHD1, DDHD2, NEU3, PAFAH1B1, PAFAH1B1, PAFAH1B2, PCCA, PLCB4, PRDX6, RAB7A, TBL1XR1, APOB, PLA1A, PLA2G12A, PNPLA2	PNPLA2
Lipogenesis	GO:0008610	ACLY, ACSL4, FDFT1, PRKAA1, PRKAA2, SC5D, SCD	SCD
Cholesterol metabolism	GO:0008203	CAT, CEBPA, DHCR7, FDFT1, HMGCS1, INSIG1, LBR, PPARD, PRKAA1, PRKAA2, TSKU, VLDLR, ABCA1, APOB	DHCR7, HMGCS1, INSIG1
Canonical Wnt signaling pathway	GO:0060070	BCL9L, CSNK1E, CTDNEP1, EDNRB, FGF2, FGF9, FOXO1, FOXO3, FZD3, FZD6, ISL1, PYGO2, RARG, RECK, SIAH2, WNT5A, YAP1, LRP6, PTEN	FOXO1, LRP6
Abbrevations (only genes of interest listed in "qPCR"): 3'UTR, 3' untranslated region; bp, base pairs; ACACA, Acetyl-CoA Carboxylase Alpha; DHCR/, 7-Dehydrocholesterol Reductase; ELOVL6, ELOVL Fatty Acid Elongase 6; FASN, Fatty Acid Synthase; FOXO1, Forkhead box protein O1; G6PC, Glucose-6-phosphatase, catalytic; HMGCS1, 3-Hydroxy-3-Methylglutaryl-CoA Synthase 1; INSIG1, insulin-induced gene 1; I…
