# Supplementary material for: Liver microRNA transcriptome reveals miR-182 as link between type 2 diabetes and fatty liver disease in obesity
Source: eLife. 2024 Jul 22;12:RP92075. doi: 10.7554/eLife.92075 (PMC11262792; doi:10.7554/eLife.92075)
Supplement: Supplementary file 9. — Besides the relative position of the seed sequences within the 3’-UTR of the target gene, also the relative AU content of the surrounding 60 nt, whether there is an additional base pairing between the mRNA, and the miRNA 3’ of the seed and the relative position of the seed within the target 3’UTR is listed. [file elife-92075-supp9.xlsx]

## Sheet: Tabelle1
Supplementary File 9: Result of all consulted target gene databases and a comprehensive 3’UTR screening for each potential target gene of hsa-miR-182-5p. Besides the relative position of the seed sequences within the 3’-UTR of the target gene, also the relative AU content of the surrounding 60 nt, whether there is an additional base pairing between the mRNA and the miRNA 3’ of the seed and the re…
target_gene	database prediction	seed match in 3'UTR	validated (positive experiment)	Conserved_miRNA_TarScan_v7		TargetScan_v7		TarBase_v7		TarBase_v8			miRTarBase_MTI	miRDB_v6	Affymetrix (databases microcosm; MTI; miRecords)		regulator	Position_8mer	Position_7mer_m8	Position_7mer_A1	Position_6mer	Position_offset_6mer	AU_content_within_60nt	additional_3'_mRNA_binding	relative_within_UTR
				seed	score	seed	score	cell line/tissue	method	cell line/tissue	method	score	method	target score	target genes	validated	mature miRNA	3' UTR bp	3' UTR bp	3' UTR bp	3' UTR bp	3' UTR bp	fraction	position - bases
SCD	yes	yes	yes	--	--	--		MCF7/mammary gland; TZMBL/cervix	immunoprecipitation	see TarBase_v7			--	--	--	--	hsa-miR-182-5p	0	0	0	1186	0	0.514706	0 - 0	0.304649
																	hsa-miR-182-5p	0	0	0	0	1293	0.529412	0 - 0	0.332135
																	hsa-miR-182-5p	0	0	0	0	3707	0.617647	0 - 0	0.952222
FASN	yes	yes	yes	7mer_A1	0	--	--	HELA/cervix	immunoprecipitation	see TarBase_v7			--	--	--	--	hsa-miR-182-5p	0	0	0	366	0	0.323529	0 - 0	0.454658
ELOVL6	yes	yes	yes	8mer; 7mer_m8	0.00; 0.02	--	--	HEK293T/kidney; MCF/mammary gland	correlation with microarray data; immunoprecipitation	Liver (Melanoma metastatic Liver Cells )	correlation with microarray data	negative	--	--	--	--	hsa-miR-182-5p	657	0	0	0	0	0.529412	0 - 0	0.119629
																	hsa-miR-182-5p	0	4419	0	0	0	0.529412	0 - 0	0.804625
																	hsa-miR-182-5p	0	4535	0	0	0	0.5	0 - 0	0.825747
ACACA	yes	no	yes	--	--	--	--	HEK293T/kidney	correlation with microarray data; immunoprecipitation	see TarBase_v7			--	--	--	--	hsa-miR-182-5p	--	--	--	--	--	--	--	--
PNPLA2	yes	yes	no	7mer_m8	0	--	--	--	--	--	--	--	--	--	yes	--	hsa-miR-182-5p	0	76	0	0	0	0.352941	0 - 0	0.106892
PPARA	yes	yes	no	7mer_m8; 7mer_A1	0.05; 0.00	--	--	--	--	--	--	--	--	--	--	--	hsa-miR-182-5p	0	5335	0	0	0	0.558824	0 - 0	0.637015
																	hsa-miR-182-5p	0	6414	0	0	0	0.544118	0 - 0	0.765851
																	hsa-miR-182-5p	0	0	3202	0	0	0.602941	0 - 0	0.382328
																	hsa-miR-182-5p	0	0	0	2483	0	0.382353	0 - 0	0.296478
																	hsa-miR-182-5p	0	0	0	0	2886	0.661765	0 - 0	0.344597
																	hsa-miR-182-5p	0	0	0	0	6209	0.367647	0 - 0	0.741373
LRP6	yes	yes	no	7mer_m8	0	--	--	--	--	Liver (Melanoma metastatic Liver Cells)	correlation with microarray data	negative	--	--	yes	--	hsa-miR-182-5p	0	1788	0	0	0	0.632353	1781 - 5	0.35052
																	hsa-miR-182-5p	0	0	0	2332	0	0.661765	0 - 0	0.457165
																	hsa-miR-182-5p	0	0	0	0	1644	0.558824	0 - 0	0.32229
PDK1	yes	yes	no	7mer_A1; 7mer_m8	0.00; 0.02	--	--	--	--	--	--	--	--	--	--	--	hsa-miR-182-5p	0	4672	0	0	0	0.573529	0 - 0	0.367874
																	hsa-miR-182-5p	0	0	618	0	0	0.602941	0 - 0	0.0486614
																	hsa-miR-182-5p	0	0	0	2618	0	0.632353	0 - 0	0.206142
																	hsa-miR-182-5p	0	0	0	11601	0	0.544118	0 - 0	0.913465
																	hsa-miR-182-5p	0	0	0	0	1839	0.691176	0 - 0	0.144803
																	hsa-miR-182-5p	0	0	0	0	4099	0.735294	0 - 0	0.322756
																	hsa-miR-182-5p	0	0	0	0	4207	0.661765	0 - 0	0.33126
																	hsa-miR-182-5p	0	0	0	0	6622	0.529412	0 - 0	0.521417
																	hsa-miR-182-5p	0	0	0	0	10591	0.573529	0 - 0	0.833937
																	hsa-miR-182-5p	0	0	0	0	11494	0.544118	0 - 0	0.905039
INSR	yes	yes	no	8mer	0	--	--	--	--	--	--	--	--	57	--	--	hsa-miR-182-5p	2093	0	0	0	0	0.691176	0 - 0	0.436861
IRS1	yes	yes	yes	7mer_m8	0.15	--	--	MCF7/mammary gland; TZMBL/cervix	immunoprecipitation	MCF7/mammary gland; TZMBL/cervix	immunoprecipitation	0.68	--	--	--	--	hsa-miR-182-5p	0	3873	0	0	0	0.558824	0 - 0	0.780847
																	hsa-miR-182-5p	0	0	0	210	0	0.617647	199 - 6;200 - 5	0.0423387
																	hsa-miR-182-5p	0	0	0	4932	0	0.644068	0 - 0	0.994355
																	hsa-miR-182-5p	0	0	0	0	4255	0.632353	0 - 0	0.857863
FOXO1	yes	yes	yes	7mer_A1	0.72	7mer_A1	0.72	HEK293T/kidney; MCF7/mammary gland; MDAMB232/mamary gland	correlation with microarray data, Luciferase Reporter Assay, Western Blot, qPCR	see TarBase_v7			Luciferase Reporter Assay, Western Blot, qPCR	75	yes	yes	hsa-miR-182-5p	0	0	265	0	0	0.661765	0 - 0	0.078356
																	hsa-miR-182-5p	0	0	2140	0	0	0.588235	0 - 0	0.632762
																	hsa-miR-182-5p	0	0	0	0	557	0.529412	0 - 0	0.164695
G6PC	yes	yes	no	7mer_m8	0.01	--	--	--	--	--	--	--	--	--	--	--	hsa-miR-182-5p	0	0	0	697	0	0.647059	0 - 0	0.231408
PCK1	no	yes	no	--	--	--	--	--	--	--	--	--	--	--	--	--	hsa-miR-182-5p	0	0	0	1172	0	0.426471	0 - 0	0.505826
																	hsa-miR-182-5p	0	0	0	0	1591	0.455882	0 - 0	0.686664
																	hsa-miR-182-5p	0	0	0	0	2095	0.397059	0 - 0	0.904186
DHCR7	yes	yes	yes	--	--	--	--	TZMBL/cervix	immunoprecipitation	see TarBase_v7			--		--	--	hsa-miR-182-5p	0	0	0	0	213	0.485294	0 - 0	0.22327
HMGCS1	yes	yes	yes	7mer_A1	0	--	--	TZMBL/cervix	immunoprecipitation	see TarBase_v7		0.51	--		--	--	hsa-miR-182-5p	0	0	214	0	0	0.544118	0 - 0	0.058454
INISG1	yes	yes	no	7mer_m8	0.73	7mer_m8	0.73	--	--	--	--	--	--	90	--	--	hsa-miR-182-5p	0	1780	0	0	0	0.735294	0 - 0	0.905852
																	hsa-miR-182-5p	0	0	0	0	311	0.691176	0 - 0	0.15827
																	hsa-miR-182-5p	0	0	0	0	849	0.602941	0 - 0	0.432061
																	hsa-miR-182-5p	0	0	0	0	1780	0.735294	0 - 0	0.905852
Abbrevations: 3'UTR, 3' untranslated region; bp, base pairs; ACACA, Acetyl-CoA Carboxylase Alpha; DHCR/, 7-Dehydrocholesterol Reductase; ELOVL6, ELOVL Fatty Acid Elongase 6; FASN, Fatty Acid Synthase; FOXO1, Forkhead box protein O1; G6PC, Glucose-6-phosphatase, catalytic; HMGCS1, 3-Hydroxy-3-Methylglutaryl-CoA Synthase 1; INSIG1, insulin-induced gene 1; INSR, insulin receptor; IRS1, Insulin recep…
